# Supplementary material for: Guest-dependent spin transitions in Hofmann-like FeII SCO metal–organic frameworks: hints from quantum chemistry calculations
Source: Royal Society of Chemistry journal article supplement (doi:10.1039/d4tc01041h), 2024-01-01
Supplement: d4tc01041h1.pdf [file d4tc01041h1.pdf]

Supporting Information

**GUEST-DEPENDENT SPIN TRANSITIONS IN HOFMANN-LIKE FEII SCO METAL-ORGANIC  
FRAMEWORKS: HINTS FROM QUANTUM CHEMISTRY CALCULATIONS**

David Arias-Olivares, Rocio Sánchez de Armas and Carmen J. Calzado\*

Departamento de Química Física, Universidad de Sevilla  
c/ Prof. García González, s/n, 41012 Sevilla, Spain

**Table S1.** (a) Selected bond lengths (Å) and cell volume (Å<sup>3</sup>) for Ni-naph and Ni-nitro in the optimized HSHS, HSLs and LSLs electronic configurations. (b) Selected information for Pd-naph and Pd-nitro. Available experimental data in parentheses.

**Table S2.** Optimized cell parameters for M-naph and M-nitro, for M=Pd, Ni.

**Table S3.** . Transition electronic energy (kJ/mol) and zero-point corrections (ZPE) for M-naph and M-nitro systems.

**Figure S1.** Transition enthalpy and entropy calculated at 298K for all considered systems

**Table S4.** Optimized coordinates for Pd-nitro, Pd-naph, Ni-nitro and Ni-naph systems

**Table S1.** Selected bond lengths (Å) and cell volume (Å<sup>3</sup>) for (a) Ni-naph and Ni-nitro and (b) Pd-naph and Pd-nitro in the optimized HSHS, HSLs and LSLs electronic configurations. Available experimental data in parentheses. Labelling as in Figure 3 in main text.

(a)

|                                      | Ni-naph     |             |             | Ni-nitro    |            |             |
|--------------------------------------|-------------|-------------|-------------|-------------|------------|-------------|
|                                      | HSHS        | HSLs        | LSLS        | HSHS        | HSLs model | LSLS        |
| Volume                               | 1592 (1639) | 1531 (1575) | 1488 (1519) | 1554 (1595) | 1507       | 1450 (1473) |
| Fe <sub>2</sub> - N <sub>3,4</sub>   | 2.06 (2.14) | 1.89 (1.94) | 1.89 (1.94) | 2.09 (2.15) | 1.89       | 1.89 (1.94) |
| Fe <sub>2</sub> - N <sub>11,12</sub> | 2.11 (2.15) | 1.89 (1.95) | 1.90 (1.95) | 2.09 (2.15) | 1.89       | 1.89 (1.94) |
| Fe <sub>2</sub> - N <sub>1,2</sub>   | 2.21 (2.20) | 1.96 (2.00) | 1.96 (2.00) | 2.15 (2.21) | 1.96       | 1.96 (2.00) |
| Fe <sub>1</sub> - N <sub>5,6</sub>   | 2.06 (2.14) | 2.08 (2.14) | 1.89 (1.94) | 2.09 (2.14) | 2.09       | 1.90 (1.94) |
| Fe <sub>1</sub> - N <sub>7,8</sub>   | 2.11 (2.14) | 2.10 (2.13) | 1.90 (1.95) | 2.09 (2.14) | 2.09       | 1.90 (1.94) |
| Fe <sub>1</sub> - N <sub>9,10</sub>  | 2.16 (2.22) | 2.17 (2.23) | 1.97 (2.00) | 2.14 (2.22) | 2.14       | 1.96 (2.00) |
| Fe <sub>2</sub> - N aver             | 2.13 (2.16) | 1.91 (1.96) | 1.92 (1.96) | 2.11 (2.17) | 1.91       | 1.91 (1.96) |
| Fe <sub>1</sub> - N aver             | 2.11 (2.17) | 2.12 (2.17) | 1.92 (1.96) | 2.11 (2.17) | 2.11       | 1.92 (1.96) |

(b)

|                                      | Pd-naph     |             |             | Pd-nitro    |            |             |
|--------------------------------------|-------------|-------------|-------------|-------------|------------|-------------|
|                                      | HSHS        | HSLs        | LSLS        | HSHS        | HSLs model | LSLS        |
| Volume                               | 1634 (1693) | 1588 (1635) | 1538 (1568) | 1534 (1592) | 1521       | 1489(1517)  |
| Fe <sub>2</sub> - N <sub>3,4</sub>   | 2.09 (2.14) | 1.89(1.95)  | 1.88 (1.94) | 2.10 (2.15) | 2.09       | 1.89 (1.93) |
| Fe <sub>2</sub> - N <sub>11,12</sub> | 2.11 (2.15) | 1.90 (1.94) | 1.89 (1.95) | 2.10 (2.16) | 2.08       | 1.89 (1.93) |
| Fe <sub>2</sub> - N <sub>1,2</sub>   | 2.15 (2.2)  | 1.97 (2.01) | 1.96 (2.00) | 2.15 (2.19) | 2.15       | 1.96 (1.99) |
| Fe <sub>1</sub> - N <sub>5,6</sub>   | 2.08 (2.13) | 2.10 (2.12) | 1.89 (1.93) | 2.09 (2.14) | 1.89       | 1.89 (1.93) |
| Fe <sub>1</sub> - N <sub>7,8</sub>   | 2.12 (2.13) | 2.07 (2.13) | 1.90 (1.94) | 2.10 (2.14) | 1.89       | 1.89 (1.94) |
| Fe <sub>1</sub> - N <sub>9,10</sub>  | 2.14 (2.22) | 2.17 (2.22) | 1.97 (2.00) | 2.16 (2.21) | 1.96       | 1.96 (1.99) |
| Fe <sub>2</sub> - N aver             | 2.12 (2.16) | 1.92 (1.97) | 1.91 (1.96) | 2.12 (2.17) | 2.11       | 1.91 (1.95) |
| Fe <sub>1</sub> - N aver             | 2.11 (2.16) | 2.11 (2.16) | 1.92 (1.96) | 2.12 (2.16) | 1.91       | 1.91 (1.95) |



**Table S2.** Optimized cell parameters for M-naph and M-nitro, for M=Pd, Ni. In parenthesis, the available experimental data.

|                     | Ni-naph       |                |                 | Ni-nitro      |            |                 |
|---------------------|---------------|----------------|-----------------|---------------|------------|-----------------|
|                     | HSHS          | HSLs           | LSLS            | HSHS          | HSLs model | LSLS            |
| a(Å)                | 7.40 (7.33)   | 7.26 (7.82)    | 7.14 (7.04)     | 13.42 (14.02) | 13.24      | 13.08 (13.56)   |
| b (Å)               | 13.49 (14.14) | 13.49 (13.93)  | 13.35 (13.77)   | 7.50 (7.32)   | 7.39       | 7.24 (7.06)     |
| c (Å)               | 16.41 (16.39) | 16.41 (16.47)  | 16.39 (16.49)   | 15.56 (5.70)  | 15.62      | 15.57 (15.66)   |
| $\alpha$ (°)        | 77.03 (76.39) | 74.84 (74.78)  | 106.36 (106.95) | 90.00 (90.00) | 90.00      | 90.00 (90.00)   |
| $\beta$ (°)         | 86.37 (83.50) | 80.89 (82.11)  | 96.30 (96.41)   | 97.43 (98.41) | 99.24      | 100.18 (100.70) |
| $\gamma$ (°)        | 91.17 (89.94) | 90.18 (89.881) | 90.23 (90.01)   | 90.00 (90.00) | 90.00      | 90.00 (90.00)   |
| V (Å <sup>3</sup> ) | 1592 (1639)   | 1531 (1575)    | 1488 (1519)     | 1554 (1595)   | 1508       | 1450 (1473)     |

|                     | Pd-naph         |               |                 | Pd-nitro      |            |               |
|---------------------|-----------------|---------------|-----------------|---------------|------------|---------------|
|                     | HSHS            | HSLs          | LSLS            | HSHS          | HSLs model | LSLS          |
| a(Å)                | 7.53 (7.51)     | 7.42 (7.38)   | 7.31 (7.23)     | 7.55 (7.49)   | 7.42       | 7.36 (7.23)   |
| b (Å)               | 13.95 (14.33)   | 13.73 (14.14) | 13.55 (13.94)   | 13.85 (14.27) | 13.58      | 13.36 (13.80) |
| c (Å)               | 15.97 (16.19)   | 16.27 (16.39) | 16.24 (16.33)   | 14.68 (15.03) | 15.18      | 15.33 (15.43) |
| $\alpha$ (°)        | 101.56 (102.72) | 75.70 (74.81) | 105.68 (106.29) | 89.28 (86.07) | 83.86      | 81.55 (80.62) |
| $\beta$ (°)         | 95.85(95.11)    | 81.46 (82.40) | 96.65 (96.50)   | 80.03 (84.01) | 91.50      | 89.24 (86.87) |
| $\gamma$ (°)        | 90.61 (90.03)   | 90.08 (89.90) | 90.12 (89.90)   | 88.46 (89.60) | 90.94      | 90.00 (89.87) |
| V (Å <sup>3</sup> ) | 1634 (1693)     | 1588 (1635)   | 1538 (1568)     | 1534 (1592)   | 1521       | 1489(1517)    |

**Table S3.** Transition electronic energy (kJ/mol) and zero-point corrections (ZPE) for M-naph and M-nitro systems.

|                                     |            | <b>Pd-nitro</b><br><b>1 step</b> | <b>Pt-nitro</b><br><b>1 step</b> | <b>Ni-nitro</b><br><b>2 steps</b> | <b>Pd-naph</b><br><b>2 steps</b> | <b>Pt-naph</b><br><b>2 steps</b> | <b>Ni-naph</b><br><b>2 steps</b> |
|-------------------------------------|------------|----------------------------------|----------------------------------|-----------------------------------|----------------------------------|----------------------------------|----------------------------------|
| <b><math>\Delta E_{elec}</math></b> | HSLs-LSLS  | 37.8                             | 37.4                             | 37.1                              | 34.7                             | 33.7                             | 31.1                             |
|                                     | HSHS-HSLS  | 35.8                             | 33.8                             | 36.5                              | 42.5                             | 39.9                             | 35.2                             |
|                                     | barycentre | 36.8                             | 35.6                             | 36.8                              | 38.6                             | 36.8                             | 33.2                             |
| <b><math>\Delta ZPE</math></b>      | HSLs-LSLS  | -7.73                            | -6.22                            | -8.61                             | -8.27                            | -6.75                            | -7.35                            |
|                                     | HSHS-HSLS  | -7.80                            | -8.82                            | -6.28                             | -8.54                            | -9.28                            | -7.42                            |

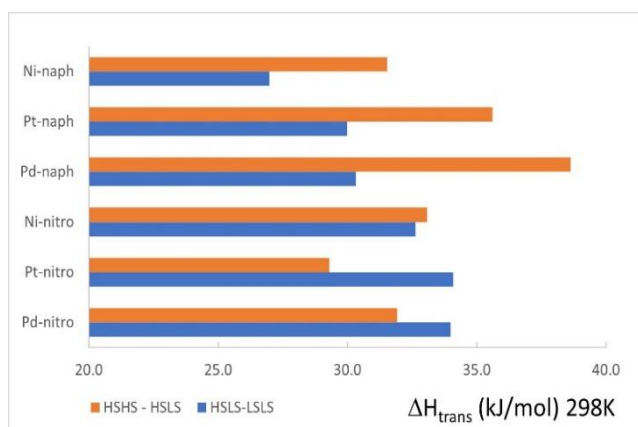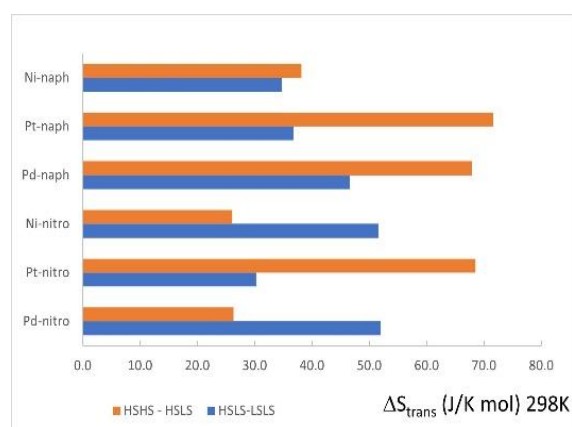

**Figure S1.** Transition enthalpy and entropy calculated at 298K for all considered systems.

**Table S4.** Optimized coordinates for Pd-nitro, Pd-naph, Ni-nitro and Ni-naph systems

**2NiphNO2 HSHS**

|                     |                    |                     |    |    |   |  |
|---------------------|--------------------|---------------------|----|----|---|--|
| 1.0000000000000000  |                    |                     |    |    |   |  |
| 13.4205070581326780 | 0.0000000000000000 | 0.0885884002471205  |    |    |   |  |
| 0.0000000000000000  | 7.5007842861084724 | 0.0000000000000000  |    |    |   |  |
| -2.1134339764031145 | 0.0000000000000000 | 15.4190133842251456 |    |    |   |  |
| Fe                  | N                  | C                   | H  | Ni | O |  |
| 2                   | 16                 | 60                  | 36 | 2  | 8 |  |
| Direct              |                    |                     |    |    |   |  |
| 0.0000000000000000  | 0.0000000000000000 | 0.0000000000000000  |    |    |   |  |
| 0.5000000000321023  | 0.0000000000000000 | 0.0000000000000000  |    |    |   |  |
| 0.1024784538671284  | 0.0000000000000000 | 0.1183692918699180  |    |    |   |  |
| 0.8975215162806904  | 0.0000000000000000 | 0.8816307304622271  |    |    |   |  |
| 0.9137987168898576  | 0.2016680932386876 | 0.0465875378826723  |    |    |   |  |
| 0.0862012756590573  | 0.7983319216848486 | 0.9534124770461858  |    |    |   |  |
| 0.0862012756590573  | 0.2016680932386876 | 0.9534124770461858  |    |    |   |  |
| 0.9137987168898576  | 0.7983319216848486 | 0.0465875378826723  |    |    |   |  |
| 0.3900924285330518  | 0.1991449545962567 | 0.9955054182484631  |    |    |   |  |
| 0.6099075714159596  | 0.8008550155430072 | 0.0044945817450852  |    |    |   |  |
| 0.6099075714159596  | 0.1991449545962567 | 0.0044945817450852  |    |    |   |  |
| 0.3900924285330518  | 0.8008550155430072 | 0.9955054182484631  |    |    |   |  |
| 0.4827523188578979  | 0.0000000000000000 | 0.8613003826824865  |    |    |   |  |
| 0.5172476810911064  | 0.0000000000000000 | 0.1386996173110759  |    |    |   |  |
| 0.3494835262377549  | 0.5000000000204778 | 0.2841252277599864  |    |    |   |  |
| 0.6505164737388256  | 0.5000000000204778 | 0.7158748020397923  |    |    |   |  |
| 0.1301766297743256  | 0.0000000000000000 | 0.5348188358648329  |    |    |   |  |
| 0.8698233851556409  | 0.0000000000000000 | 0.4651811641287225  |    |    |   |  |
| 0.2030534220246594  | 0.0000000000000000 | 0.1197215637492661  |    |    |   |  |
| 0.7969466077626279  | 0.0000000000000000 | 0.8802784511795849  |    |    |   |  |
| 0.2685356422460927  | 0.0000000000000000 | 0.1964002367127051  |    |    |   |  |
| 0.7314643577466882  | 0.0000000000000000 | 0.8035997334746270  |    |    |   |  |
| 0.2285814050969321  | 0.0000000000000000 | 0.2758047672014499  |    |    |   |  |
| 0.7714185650766083  | 0.0000000000000000 | 0.7241952029858965  |    |    |   |  |
| 0.1231530648122359  | 0.0000000000000000 | 0.2737588495346586  |    |    |   |  |
| 0.8768469575644318  | 0.0000000000000000 | 0.7262411802651272  |    |    |   |  |
| 0.0636258856200698  | 0.0000000000000000 | 0.1939714064396583  |    |    |   |  |
| 0.9363741366852594  | 0.0000000000000000 | 0.8060286233601204  |    |    |   |  |
| 0.2902725618717810  | 0.0000000000000000 | 0.3563928277900246  |    |    |   |  |
| 0.7097274381047924  | 0.0000000000000000 | 0.6436072020097470  |    |    |   |  |
| 0.3360493052811862  | 0.0000000000000000 | 0.4299381552109836  |    |    |   |  |
| 0.6639507245583900  | 0.0000000000000000 | 0.5700618447825789  |    |    |   |  |
| 0.8567639040881048  | 0.3213744991686696 | 0.0427467309839074  |    |    |   |  |
| 0.1432361108300029  | 0.6786254709705943 | 0.9572532876787747  |    |    |   |  |
| 0.1432361108300029  | 0.3213744991686696 | 0.9572532876787747  |    |    |   |  |
| 0.8567639040881048  | 0.6786254709705943 | 0.0427467309839074  |    |    |   |  |
| 0.6659854278394661  | 0.3200068812753472 | 0.0145623683961915  |    |    |   |  |
| 0.3340145721371073  | 0.6799931187656156 | 0.9854376614035942  |    |    |   |  |
| 0.3340145721371073  | 0.3200068812753472 | 0.9854376614035942  |    |    |   |  |
| 0.6659854278394661  | 0.6799931187656156 | 0.0145623683961915  |    |    |   |  |
| 0.4749186510537626  | 0.1548346514477785 | 0.8167046036706225  |    |    |   |  |
| 0.5250813488952417  | 0.8451653634757577 | 0.1832953963229400  |    |    |   |  |
| 0.5250813488952417  | 0.1548346514477785 | 0.1832953963229400  |    |    |   |  |
| 0.4749186510537626  | 0.8451653634757577 | 0.8167046036706225  |    |    |   |  |
| 0.4553047239491761  | 0.1613048205216145 | 0.7270984862492966  |    |    |   |  |
| 0.5446952462519477  | 0.8386951645002299 | 0.2729015137442730  |    |    |   |  |
| 0.5446952462519477  | 0.1613048205216145 | 0.2729015137442730  |    |    |   |  |

|                    |                    |                    |
|--------------------|--------------------|--------------------|
| 0.4553047239491761 | 0.8386951645002299 | 0.7270984862492966 |
| 0.4422365702918682 | 0.0000000000000000 | 0.6803258082464652 |
| 0.5577634594763694 | 0.0000000000000000 | 0.3196741917470902 |
| 0.4124756008733499 | 0.0000000000000000 | 0.5902597242551906 |
| 0.5875243991470072 | 0.0000000000000000 | 0.4097402757383719 |
| 0.3792788359982140 | 0.0000000000000000 | 0.5129636962706101 |
| 0.6207211639507904 | 0.0000000000000000 | 0.4870363037229595 |
| 0.2391941119290735 | 0.5000000000204778 | 0.2764840464351934 |
| 0.7608059030114234 | 0.5000000000204778 | 0.7235159536227442 |
| 0.1846881376502267 | 0.5000000000204778 | 0.1936862136944910 |
| 0.8153118325946593 | 0.5000000000204778 | 0.8063137564928553 |
| 0.0802087966305933 | 0.5000000000204778 | 0.1860637353867958 |
| 0.9197912108279453 | 0.5000000000204778 | 0.8139362795420624 |
| 0.0320479710471560 | 0.5000000000204778 | 0.2606919021927396 |
| 0.9679520588029575 | 0.5000000000204778 | 0.7393080978651980 |
| 0.0878459194128354 | 0.5000000000204778 | 0.3431281950612544 |
| 0.9121540879990917 | 0.5000000000204778 | 0.6568717751260849 |
| 0.1926005133666919 | 0.5000000000204778 | 0.3517066532027826 |
| 0.8073994866098815 | 0.5000000000204778 | 0.6482933765969889 |
| 0.1604607643725160 | 0.0000000000000000 | 0.6291422537976459 |
| 0.8395392355870328 | 0.0000000000000000 | 0.3708577462602918 |
| 0.1749187857906236 | 0.1629579610120544 | 0.6722840228544342 |
| 0.8250812290680045 | 0.8370420687940623 | 0.3277159771391283 |
| 0.8250812290680045 | 0.1629579610120544 | 0.3277159771391283 |
| 0.1749187857906236 | 0.8370420687940623 | 0.6722840228544342 |
| 0.2055965226807359 | 0.1615882101925550 | 0.7613393401270017 |
| 0.7944034475203878 | 0.8384117600832468 | 0.2386606598665608 |
| 0.7944034475203878 | 0.1615882101925550 | 0.2386606598665608 |
| 0.2055965226807359 | 0.8384117600832468 | 0.7613393401270017 |
| 0.2211112742371100 | 0.0000000000000000 | 0.8057771016854076 |
| 0.7788887108736233 | 0.0000000000000000 | 0.1942228983081549 |
| 0.2309982902646226 | 0.0000000000000000 | 0.0572979294337017 |
| 0.7690016799545347 | 0.0000000000000000 | 0.9427020928984291 |
| 0.3490014617300972 | 0.0000000000000000 | 0.1948785750495716 |
| 0.6509985382626837 | 0.0000000000000000 | 0.8051213951377747 |
| 0.0901201319244720 | 0.0000000000000000 | 0.3339011447960942 |
| 0.9098798755968858 | 0.0000000000000000 | 0.6660988552618434 |
| 0.9820612275688916 | 0.0000000000000000 | 0.1888519334832637 |
| 0.0179387905712716 | 0.0000000000000000 | 0.8111480665102917 |
| 0.4847111700337052 | 0.2758683531865600 | 0.8551410211836625 |
| 0.5152888001674114 | 0.7241316467178649 | 0.1448589788099000 |
| 0.5152888001674114 | 0.2758683531865600 | 0.1448589788099000 |
| 0.4847111700337052 | 0.7241316467178649 | 0.8551410211836625 |
| 0.4500423610826445 | 0.2884391200028773 | 0.6935189684021736 |
| 0.5499576687569245 | 0.7115608800380784 | 0.3064810315913888 |
| 0.5499576687569245 | 0.2884391200028773 | 0.3064810315913888 |
| 0.4500423610826445 | 0.7115608800380784 | 0.6935189684021736 |
| 0.2241436190971768 | 0.5000000000204778 | 0.1369091634671733 |
| 0.7758563510954275 | 0.5000000000204778 | 0.8630908216554687 |
| 0.0366438552213424 | 0.5000000000204778 | 0.1222002705479142 |
| 0.9633561224179772 | 0.5000000000204778 | 0.8777997443809511 |
| 0.9502530292508382 | 0.5000000000204778 | 0.2541075752230171 |
| 0.0497469763338643 | 0.5000000000204778 | 0.7458924247705312 |
| 0.0502594181282703 | 0.5000000000204778 | 0.4010497925924383 |
| 0.9497405595195545 | 0.5000000000204778 | 0.5989502372073403 |
| 0.2379802004576845 | 0.5000000000204778 | 0.4147609093873470 |
| 0.7620198144447130 | 0.5000000000204778 | 0.5852390607999993 |
| 0.1626057361633144 | 0.2857569913758411 | 0.6356421860623556 |

|                    |                    |                    |
|--------------------|--------------------|--------------------|
| 0.8373942489474189 | 0.7142430086651075 | 0.3643578139311998 |
| 0.8373942489474189 | 0.2857569913758411 | 0.3643578139311998 |
| 0.1626057361633144 | 0.7142430086651075 | 0.6356421860623556 |
| 0.2174332435488964 | 0.2861435370416530 | 0.7968665310956808 |
| 0.7825667415618369 | 0.7138564330976180 | 0.2031334688978959 |
| 0.7825667415618369 | 0.2861435370416530 | 0.2031334688978959 |
| 0.2174332435488964 | 0.7138564330976180 | 0.7968665310956808 |
| 0.2452049881343612 | 0.0000000000000000 | 0.8751368552317942 |
| 0.7547950118146503 | 0.0000000000000000 | 0.1248631447617683 |
| 0.7608820617363889 | 0.5000000000204778 | 0.0304447358425008 |
| 0.2391179233872123 | 0.5000000000204778 | 0.9695552380786765 |
| 0.3984871014374534 | 0.5000000000204778 | 0.3580198760008670 |
| 0.6015128985828966 | 0.5000000000204778 | 0.6419801239926954 |
| 0.3891844198702685 | 0.5000000000204778 | 0.2157073400386196 |
| 0.6108155502870716 | 0.5000000000204778 | 0.7842926897611591 |
| 0.1183422010037205 | 0.1467886442245145 | 0.4971351393180896 |
| 0.8816578139262390 | 0.8532113706990359 | 0.5028648606754729 |
| 0.8816578139262390 | 0.1467886442245145 | 0.5028648606754729 |
| 0.1183422010037205 | 0.8532113706990359 | 0.4971351393180896 |

2NiphNO2 HSLs

|                     |                    |                     |    |    |   |  |  |
|---------------------|--------------------|---------------------|----|----|---|--|--|
| 1.0000000000000000  |                    |                     |    |    |   |  |  |
| 13.2648546848216835 | 0.0000000000000000 | 0.1459879541168690  |    |    |   |  |  |
| 0.0000000000000000  | 7.3664548422129696 | 0.0000000000000000  |    |    |   |  |  |
| -2.7069581259491242 | 0.0000000000000000 | 15.3865804345564001 |    |    |   |  |  |
| Fe                  | N                  | C                   | H  | Ni | O |  |  |
| 2                   | 16                 | 60                  | 36 | 2  | 8 |  |  |
| Direct              |                    |                     |    |    |   |  |  |
| 0.0000000000000000  | 0.0000000000000000 | 0.0000000000000000  |    |    |   |  |  |
| 0.5000000000147509  | 0.0000000000000000 | 0.0000000000000000  |    |    |   |  |  |
| 0.0818899791632930  | 0.8133568601610364 | 0.9642313577320891  |    |    |   |  |  |
| 0.9181100208261270  | 0.1866431398531319 | 0.0357686422874082  |    |    |   |  |  |
| 0.9181100208261270  | 0.8133568601610364 | 0.0357686422874082  |    |    |   |  |  |
| 0.0818899791632930  | 0.1866431398531319 | 0.9642313577320891  |    |    |   |  |  |
| 0.9085814492858759  | 0.0000000000000000 | 0.8880653725699688  |    |    |   |  |  |
| 0.0914185507773126  | 0.0000000000000000 | 0.1119346274495285  |    |    |   |  |  |
| 0.5141469848632241  | 0.0000000000000000 | 0.1385421529407935  |    |    |   |  |  |
| 0.4858530150732747  | 0.0000000000000000 | 0.8614578619608508  |    |    |   |  |  |
| 0.6126173330590134  | 0.7987124824949419 | 0.0099988197393088  |    |    |   |  |  |
| 0.3873826669600220  | 0.2012875175192264 | 0.9900011625385901  |    |    |   |  |  |
| 0.3873826669600220  | 0.7987124824949419 | 0.9900011625385901  |    |    |   |  |  |
| 0.6126173330590134  | 0.2012875175192264 | 0.0099988197393088  |    |    |   |  |  |
| 0.6486352950813554  | 0.4999999999362501 | 0.7135869712037959  |    |    |   |  |  |
| 0.3513647049080788  | 0.4999999999362501 | 0.2864130288156943  |    |    |   |  |  |
| 0.8704348630327843  | 0.0000000000000000 | 0.4694853441180555  |    |    |   |  |  |
| 0.1295651369748043  | 0.0000000000000000 | 0.5305146260721614  |    |    |   |  |  |
| 0.1339575331506353  | 0.6866380007420005 | 0.9578088262938422  |    |    |   |  |  |
| 0.8660424669125533  | 0.3133619992721677 | 0.0421911737256551  |    |    |   |  |  |
| 0.8660424669125533  | 0.6866380007420005 | 0.0421911737256551  |    |    |   |  |  |
| 0.1339575331506353  | 0.3133619992721677 | 0.9578088262938422  |    |    |   |  |  |
| 0.3277703511796659  | 0.6795576525827656 | 0.9784374393839173  |    |    |   |  |  |
| 0.6722296488097612  | 0.3204423474314027 | 0.0215625606355800  |    |    |   |  |  |
| 0.6722296488097612  | 0.6795576525827656 | 0.0215625606355800  |    |    |   |  |  |
| 0.3277703511796659  | 0.3204423474314027 | 0.9784374393839173  |    |    |   |  |  |
| 0.9468671448840311  | 0.0000000000000000 | 0.8129500539132337  |    |    |   |  |  |



|                    |                    |                    |
|--------------------|--------------------|--------------------|
| 0.0531328551053960 | 0.0000000000000000 | 0.1870499461062636 |
| 0.8852106910985569 | 0.0000000000000000 | 0.7323997725985905 |
| 0.1147893088769365 | 0.0000000000000000 | 0.2676002273559206 |
| 0.7781024353574324 | 0.0000000000000000 | 0.7277541947872450 |
| 0.2218975646180539 | 0.0000000000000000 | 0.2722458051672660 |
| 0.7389247860145289 | 0.0000000000000000 | 0.8063326475970101 |
| 0.2610752139609573 | 0.0000000000000000 | 0.1936673523574939 |
| 0.8058308332608206 | 0.0000000000000000 | 0.8842157572044869 |
| 0.1941691667285994 | 0.0000000000000000 | 0.1157842428150104 |
| 0.7144386307303208 | 0.0000000000000000 | 0.6462914168271823 |
| 0.2855613692451655 | 0.0000000000000000 | 0.3537085831273288 |
| 0.6665240540237534 | 0.0000000000000000 | 0.5721592248967298 |
| 0.3334759459656809 | 0.0000000000000000 | 0.4278407751227675 |
| 0.6218577940191139 | 0.0000000000000000 | 0.4884022379290016 |
| 0.3781422059884676 | 0.0000000000000000 | 0.5115977322612082 |
| 0.5878765354834457 | 0.0000000000000000 | 0.4104712452740458 |
| 0.4121234645615957 | 0.0000000000000000 | 0.5895287845747319 |
| 0.5572648407043772 | 0.0000000000000000 | 0.3199271713616056 |
| 0.4427351593448634 | 0.0000000000000000 | 0.6800728285929054 |
| 0.5436860251897642 | 0.8357994388486105 | 0.2729839748119787 |
| 0.4563139747996701 | 0.1642005611655577 | 0.7270160252075186 |
| 0.4563139747996701 | 0.8357994388486105 | 0.7270160252075186 |
| 0.5436860251897642 | 0.1642005611655577 | 0.2729839748119787 |
| 0.5226757945894676 | 0.8423895276904361 | 0.1831804857622146 |
| 0.4773242053651856 | 0.1576104723237393 | 0.8168194993101423 |
| 0.4773242053651856 | 0.8423895276904361 | 0.8168194993101423 |
| 0.5226757945894676 | 0.1576104723237393 | 0.1831804857622146 |
| 0.7605334873358984 | 0.499999999362501  | 0.7235857921452933 |
| 0.2394665126535287 | 0.499999999362501  | 0.2764142078742040 |
| 0.8163925309925020 | 0.499999999362501  | 0.8075031316790202 |
| 0.1836074689969323 | 0.499999999362501  | 0.1924968683404771 |
| 0.9224965415367379 | 0.499999999362501  | 0.8175754281942389 |
| 0.0775034585264507 | 0.499999999362501  | 0.1824245718252513 |
| 0.9709388494583635 | 0.499999999362501  | 0.7443672067324201 |
| 0.0290611505171299 | 0.499999999362501  | 0.2556327932220839 |
| 0.9137804265502538 | 0.499999999362501  | 0.6608217242415861 |
| 0.0862195734391804 | 0.499999999362501  | 0.3391782757779112 |
| 0.8073031186592914 | 0.499999999362501  | 0.6496881376858425 |
| 0.1926968813899563 | 0.499999999362501  | 0.3503118622686614 |
| 0.8400845114663937 | 0.0000000000000000 | 0.3745278340060381 |
| 0.1599154885230334 | 0.0000000000000000 | 0.6254721660134592 |
| 0.8256382646716247 | 0.8340591462700218 | 0.3311689022227782 |
| 0.1743617353359639 | 0.1659408537441465 | 0.6688310679674387 |
| 0.1743617353359639 | 0.8340591462700218 | 0.6688310679674387 |
| 0.8256382646716247 | 0.1659408537441465 | 0.3311689022227782 |
| 0.7945124849594194 | 0.8354478009872821 | 0.2415409037953467 |
| 0.2054875150160811 | 0.1645521990268861 | 0.7584590961591644 |
| 0.2054875150160811 | 0.8354478009872821 | 0.7584590961591644 |
| 0.7945124849594194 | 0.1645521990268861 | 0.2415409037953467 |
| 0.7785976500419807 | 0.0000000000000000 | 0.1968656288479593 |
| 0.2214023499474536 | 0.0000000000000000 | 0.8031343711715380 |
| 0.0294794969817858 | 0.0000000000000000 | 0.8192697146399439 |
| 0.9705205030076485 | 0.0000000000000000 | 0.1807302853795534 |
| 0.9184761930647554 | 0.0000000000000000 | 0.6732921966752627 |
| 0.0815238069246789 | 0.0000000000000000 | 0.3267078033442345 |
| 0.6572760329386114 | 0.0000000000000000 | 0.8065493724274972 |
| 0.3427239670508158 | 0.0000000000000000 | 0.1934506275920000 |
| 0.7778776485079462 | 0.0000000000000000 | 0.9455966762327606 |

|                    |                    |                    |
|--------------------|--------------------|--------------------|
| 0.2221223514814881 | 0.0000000000000000 | 0.0544033237867367 |
| 0.5494432893667067 | 0.7064723088253544 | 0.3066289849797244 |
| 0.4505567106408748 | 0.2935276911888067 | 0.6933709852104855 |
| 0.4505567106408748 | 0.7064723088253544 | 0.6933709852104855 |
| 0.5494432893667067 | 0.2935276911888067 | 0.3066289849797244 |
| 0.5124428974288762 | 0.7191784696616708 | 0.1446250162074207 |
| 0.4875571025953249 | 0.2808215303524975 | 0.8553749987592099 |
| 0.4875571025953249 | 0.7191784696616708 | 0.8553749987592099 |
| 0.5124428974288762 | 0.2808215303524975 | 0.1446250162074207 |
| 0.7767947602635843 | 0.4999999999362501 | 0.8631950103651889 |
| 0.2232052397258499 | 0.4999999999362501 | 0.1368049896543084 |
| 0.9670910939731954 | 0.4999999999362501 | 0.8823100576696277 |
| 0.0329089060900003 | 0.4999999999362501 | 0.1176899423498696 |
| 0.0540626304406757 | 0.4999999999362501 | 0.7530379502220299 |
| 0.9459373695487585 | 0.4999999999362501 | 0.2469620497974674 |
| 0.9515604317014024 | 0.4999999999362501 | 0.6039819868975229 |
| 0.0484395682880248 | 0.4999999999362501 | 0.3960180131219744 |
| 0.7607799303823839 | 0.4999999999362501 | 0.5857147551653483 |
| 0.2392200696808047 | 0.4999999999362501 | 0.4142852448541490 |
| 0.8380817007436789 | 0.7091035137882358 | 0.3680656698418332 |
| 0.1619182992457482 | 0.2908964862259324 | 0.6319343301776570 |
| 0.1619182992457482 | 0.7091035137882358 | 0.6319343301776570 |
| 0.8380817007436789 | 0.2908964862259324 | 0.3680656698418332 |
| 0.7822449504800488 | 0.7087109004725960 | 0.2057411131886937 |
| 0.2177550495275398 | 0.2912890993998971 | 0.7942588570015161 |
| 0.2177550495275398 | 0.7087109004725960 | 0.7942588570015161 |
| 0.7822449504800488 | 0.2912890993998971 | 0.2057411131886937 |
| 0.7535340219403537 | 0.0000000000000000 | 0.1271225017045268 |
| 0.2464659781020018 | 0.0000000000000000 | 0.8728774834328163 |
| 0.2300699537823547 | 0.4999999999362501 | 0.9633023893666532 |
| 0.7699300461931315 | 0.4999999999362501 | 0.0366976105878578 |
| 0.5978364404477858 | 0.4999999999362501 | 0.6389250066529328 |
| 0.4021635595416484 | 0.4999999999362501 | 0.3610749933665716 |
| 0.6092506595805034 | 0.4999999999362501 | 0.7811243363103557 |
| 0.3907493404089237 | 0.4999999999362501 | 0.2188756637091416 |
| 0.8823232179500664 | 0.8505566751282458 | 0.5073447440191359 |
| 0.1176767821131222 | 0.1494433248859224 | 0.4926552560003614 |
| 0.1176767821131222 | 0.8505566751282458 | 0.4926552560003614 |
| 0.8823232179500664 | 0.1494433248859224 | 0.5073447440191359 |

2NiphNO2 LSLs

|                     |                    |                     |    |    |   |  |
|---------------------|--------------------|---------------------|----|----|---|--|
| 1.0000000000000000  |                    |                     |    |    |   |  |
| 13.0780461575723272 | 0.0000000000000000 | 0.0240438980609062  |    |    |   |  |
| 0.0000000000000000  | 7.2364849721271343 | 0.0000000000000000  |    |    |   |  |
| -2.7800526780881993 | 0.0000000000000000 | 15.3208145048027369 |    |    |   |  |
| Fe                  | N                  | C                   | H  | Ni | O |  |
| 2                   | 16                 | 60                  | 36 | 2  | 8 |  |

Direct

|                    |                    |                    |
|--------------------|--------------------|--------------------|
| 0.0000000000000000 | 0.0000000000000000 | 0.0000000000000000 |
| 0.5000000000147509 | 0.0000000000000000 | 0.0000000000000000 |
| 0.0851352062729518 | 0.8109004624389300 | 0.9667887630129641 |
| 0.9148647937164753 | 0.1890995375752311 | 0.0332112370065332 |
| 0.9148647937164753 | 0.8109004624389300 | 0.0332112370065332 |
| 0.0851352062729518 | 0.1890995375752311 | 0.9667887630129641 |
| 0.9087769053168913 | 0.0000000000000000 | 0.8856568838468988 |

|                    |                    |                    |
|--------------------|--------------------|--------------------|
| 0.0912230947462973 | 0.0000000000000000 | 0.1143431161725843 |
| 0.5123169140088990 | 0.0000000000000000 | 0.1275245420442346 |
| 0.4876830859275998 | 0.0000000000000000 | 0.8724754728574098 |
| 0.6024872089518922 | 0.8121699263517215 | 0.0098383967780578 |
| 0.3975127910671432 | 0.1878300736624610 | 0.9901615854998482 |
| 0.3975127910671432 | 0.8121699263517215 | 0.9901615854998482 |
| 0.6024872089518922 | 0.1878300736624610 | 0.0098383967780578 |
| 0.6521262104801124 | 0.4999999999362501 | 0.7188044594246961 |
| 0.3478737895093147 | 0.4999999999362501 | 0.2811955405947870 |
| 0.8691732285920537 | 0.0000000000000000 | 0.4656686280926010 |
| 0.1308267714155349 | 0.0000000000000000 | 0.5343313420976159 |
| 0.1413162838275923 | 0.6857629859921275 | 0.9626191025359248 |
| 0.8586837162355891 | 0.3142370140220407 | 0.0373808974835725 |
| 0.8586837162355891 | 0.6857629859921275 | 0.0373808974835725 |
| 0.1413162838275923 | 0.3142370140220407 | 0.9626191025359248 |
| 0.3395478105957892 | 0.6866338845468931 | 0.9814469621806268 |
| 0.6604521893936521 | 0.3133661154672822 | 0.0185530378388705 |
| 0.6604521893936521 | 0.6866338845468931 | 0.0185530378388705 |
| 0.3395478105957892 | 0.3133661154672822 | 0.9814469621806268 |
| 0.9487492578009764 | 0.0000000000000000 | 0.8112988183433529 |
| 0.0512507421884578 | 0.0000000000000000 | 0.1887011816761444 |
| 0.8870985737505350 | 0.0000000000000000 | 0.7292033833574578 |
| 0.1129014262249441 | 0.0000000000000000 | 0.2707966165970461 |
| 0.7780780210465323 | 0.0000000000000000 | 0.7221271311642639 |
| 0.2219219789289539 | 0.0000000000000000 | 0.2778728687902472 |
| 0.7371823399864610 | 0.0000000000000000 | 0.7999672421454136 |
| 0.2628176599890324 | 0.0000000000000000 | 0.2000327578090904 |
| 0.8041088174107855 | 0.0000000000000000 | 0.8794513906130490 |
| 0.1958911825786487 | 0.0000000000000000 | 0.1205486094064554 |
| 0.7136435942823809 | 0.0000000000000000 | 0.6394299073635992 |
| 0.2863564056931054 | 0.0000000000000000 | 0.3605700925909119 |
| 0.6639448236103789 | 0.0000000000000000 | 0.5647788878882594 |
| 0.3360551763790554 | 0.0000000000000000 | 0.4352211121312379 |
| 0.6175478926804132 | 0.0000000000000000 | 0.4804202639875044 |
| 0.3824521073271612 | 0.0000000000000000 | 0.5195797062027054 |
| 0.5824774071384979 | 0.0000000000000000 | 0.4018543815353510 |
| 0.4175225929065220 | 0.0000000000000000 | 0.5981456483134195 |
| 0.5519468449584295 | 0.0000000000000000 | 0.3105671067009936 |
| 0.4480531550908111 | 0.0000000000000000 | 0.6894328932535103 |
| 0.5385694946432267 | 0.8333390092970276 | 0.2629726483746424 |
| 0.4614305053462004 | 0.1666609907171477 | 0.7370273516448336 |
| 0.4614305053462004 | 0.8333390092970276 | 0.7370273516448336 |
| 0.5385694946432267 | 0.1666609907171477 | 0.2629726483746424 |
| 0.5191967345263322 | 0.8391862452264860 | 0.1726465737491409 |
| 0.4808032654283068 | 0.1608137547876822 | 0.8273534113232230 |
| 0.4808032654283068 | 0.8391862452264860 | 0.8273534113232230 |
| 0.5191967345263322 | 0.1608137547876822 | 0.1726465737491409 |
| 0.7647067169868080 | 0.4999999999362501 | 0.7217697658621631 |
| 0.2352932830026262 | 0.4999999999362501 | 0.2782302341573271 |
| 0.8295069827616217 | 0.4999999999362501 | 0.8033388495715812 |
| 0.1704930172278125 | 0.4999999999362501 | 0.1966611504479161 |
| 0.9364377140231142 | 0.4999999999362501 | 0.8065402702108315 |
| 0.0635622860400744 | 0.4999999999362501 | 0.1934597298086516 |
| 0.9767251192145210 | 0.4999999999362501 | 0.7290284785931931 |
| 0.0232748807609724 | 0.4999999999362501 | 0.2709715213613109 |
| 0.9106841345295962 | 0.4999999999362501 | 0.6479289115541107 |
| 0.0893158654598309 | 0.4999999999362501 | 0.3520710884653937 |
| 0.8032743475731436 | 0.4999999999362501 | 0.6436467527274061 |

|                    |                    |                    |
|--------------------|--------------------|--------------------|
| 0.1967256524761041 | 0.4999999999362501 | 0.3563532472271049 |
| 0.8378506442121463 | 0.0000000000000000 | 0.3701465154300934 |
| 0.1621493557772880 | 0.0000000000000000 | 0.6298534845894039 |
| 0.8229694747912859 | 0.8310897182040762 | 0.3265182159158186 |
| 0.1770305252163027 | 0.1689102818100920 | 0.6734817542744125 |
| 0.1770305252163027 | 0.8310897182040762 | 0.6734817542744125 |
| 0.8229694747912859 | 0.1689102818100920 | 0.3265182159158186 |
| 0.7913549866376286 | 0.8324835706201128 | 0.2362320099475426 |
| 0.2086450133378719 | 0.1675164293940625 | 0.7637679900069827 |
| 0.2086450133378719 | 0.8324835706201128 | 0.7637679900069827 |
| 0.7913549866376286 | 0.1675164293940625 | 0.2362320099475426 |
| 0.7753996180796250 | 0.0000000000000000 | 0.1912773064357509 |
| 0.2246003819098021 | 0.0000000000000000 | 0.8087226935837393 |
| 0.0327961304985678 | 0.0000000000000000 | 0.8195317633357746 |
| 0.9672038694908665 | 0.0000000000000000 | 0.1804682366837227 |
| 0.9218366075105138 | 0.0000000000000000 | 0.6708096575152567 |
| 0.0781633924789205 | 0.0000000000000000 | 0.3291903425042406 |
| 0.6539881278765520 | 0.0000000000000000 | 0.7981208456459115 |
| 0.3460118721128680 | 0.0000000000000000 | 0.2018791543735929 |
| 0.7747127022557692 | 0.0000000000000000 | 0.9402283938644729 |
| 0.2252872977336651 | 0.0000000000000000 | 0.0597716061550315 |
| 0.5432960634707413 | 0.7015661932992217 | 0.2965468527593913 |
| 0.4567039365368331 | 0.2984338067149395 | 0.7034531174308185 |
| 0.4567039365368331 | 0.7015661932992217 | 0.7034531174308185 |
| 0.5432960634707413 | 0.2984338067149395 | 0.2965468527593913 |
| 0.5093553410358425 | 0.7140495442667145 | 0.1340377003427733 |
| 0.4906446589883586 | 0.2859504557474608 | 0.8659623146238573 |
| 0.4906446589883586 | 0.7140495442667145 | 0.8659623146238573 |
| 0.5093553410358425 | 0.2859504557474608 | 0.1340377003427733 |
| 0.7962104663896881 | 0.4999999999362501 | 0.8625182981023443 |
| 0.2037895335997533 | 0.4999999999362501 | 0.1374817019171530 |
| 0.9879585551487651 | 0.4999999999362501 | 0.8693392761373673 |
| 0.0120414449144306 | 0.4999999999362501 | 0.1306607238821300 |
| 0.0605528464230645 | 0.4999999999362501 | 0.7322725649912272 |
| 0.9394471535663698 | 0.4999999999362501 | 0.2677274350282630 |
| 0.9422421892488657 | 0.4999999999362501 | 0.5878284671826748 |
| 0.0577578107405543 | 0.4999999999362501 | 0.4121715328368225 |
| 0.7498023879698010 | 0.4999999999362501 | 0.5817617064037108 |
| 0.2501976120933733 | 0.4999999999362501 | 0.4182382936157865 |
| 0.8355419379254272 | 0.7041569643151249 | 0.3638260852823052 |
| 0.1644580620639928 | 0.2958430356990434 | 0.6361739147371850 |
| 0.1644580620639928 | 0.7041569643151249 | 0.6361739147371850 |
| 0.8355419379254272 | 0.2958430356990434 | 0.3638260852823052 |
| 0.7788381523601444 | 0.7037470146972424 | 0.1999917678837235 |
| 0.2211618476474371 | 0.2962529851752436 | 0.8000082023064863 |
| 0.2211618476474371 | 0.7037470146972424 | 0.8000082023064863 |
| 0.7788381523601444 | 0.2962529851752436 | 0.1999917678837235 |
| 0.7502566596035436 | 0.0000000000000000 | 0.1209952348062870 |
| 0.2497433404388119 | 0.0000000000000000 | 0.8790047503310561 |
| 0.2401041148683092 | 0.4999999999362501 | 0.9684537981996542 |
| 0.7598958851071771 | 0.4999999999362501 | 0.0315462017548569 |
| 0.5934275096719617 | 0.4999999999362501 | 0.6461212475342037 |
| 0.4065724903174797 | 0.4999999999362501 | 0.3538787524852935 |
| 0.6197478685297639 | 0.4999999999362501 | 0.7897607488444862 |
| 0.3802521314596632 | 0.4999999999362501 | 0.2102392511750040 |
| 0.8814719763897898 | 0.8479417143629249 | 0.5038233689483320 |
| 0.1185280236733917 | 0.1520582856512220 | 0.4961766310711653 |
| 0.1185280236733917 | 0.8479417143629249 | 0.4961766310711653 |

0.8814719763897898 0.1520582856512220 0.5038233689483320

2Ninaph HSHS

1.0000000000000000  
7.3982190106907542 -0.0779159004037862 -0.1751617259224447  
-0.1354007228084967 13.4854252362144571 -0.1051207392770810  
1.4568237828565445 3.8216225595178832 15.8929072099773379

Fe N C H Ni  
2 12 76 48 2

Direct

0.0004126649595122 0.0016048111531930 0.9995428900886125  
0.0002773735434829 0.5015799254102546 0.9993916296400087  
0.9766637361140340 0.8929737135560813 0.1224523246994238  
0.0243382183066601 0.1098246948070241 0.8764369735558191  
0.1663762608019468 0.0978590564040402 0.0451920607127150  
0.8345128707711851 0.9052501001780158 0.9539496233961202  
0.8286829937480675 0.3754657357884312 0.0139548086386512  
0.1720981091533176 0.6276932513193287 0.9849911694564923  
0.2277120870781033 0.4093705399352672 0.0012975932762842  
0.7729849598959646 0.5938987475128457 0.9973520131783502  
0.9966397904373778 0.5251099305075186 0.8649165393429357  
0.0040170153032477 0.4776195224525139 0.1338946102829084  
0.7681298302243107 0.0746111408117116 0.0339976389395105  
0.2329449920966908 0.9287394057084839 0.9651339985799510  
0.8862623017329625 0.9216621827350338 0.1868509056037837  
0.1154244750849216 0.0809573344002459 0.8122931188415237  
0.8810452760932179 0.8650873772820162 0.2687866947458843  
0.1214799407369114 0.1373310421276273 0.7302836842980653  
0.9754027810082135 0.7740525181217137 0.2864967256703608  
0.0273223535190326 0.2284007509877100 0.7122057819146406  
0.0694283645136551 0.7443953599051554 0.2191739651924465  
0.9323968667375979 0.2582092065565931 0.7792332550692151  
0.0649967204430553 0.8051228601671383 0.1389343975639150  
0.9359571121969381 0.1976404965565095 0.8595888026968055  
0.9774334182231001 0.7161153873622794 0.3693944028709950  
0.0262881702849143 0.2861979960296708 0.6292281146520793  
0.9786056956457827 0.6709525243833596 0.4431104585725976  
0.0255497651040741 0.3312676967847921 0.5554786995887824  
0.2949584051596830 0.1514536662624337 0.0421493142888352  
0.7059218629253436 0.8517179262909309 0.9568233945903160  
0.6951834961791192 0.3245106242726763 0.0210732883087417  
0.3055004683638600 0.6787413839683083 0.9778297501811508  
0.3345696199705301 0.3453844904658609 0.0145235077349284  
0.6661316510076958 0.6578905066196796 0.9841328012085881  
0.6556515703314645 0.1340153220564346 0.0383384918870391  
0.3453304148105047 0.8693037016392395 0.9607334438718311  
0.8441525467469049 0.5069928397244681 0.8287448209215569  
0.1568041762289027 0.4958769213302290 0.1697844382803950  
0.8328531338087970 0.5271409983870612 0.7425524117304292  
0.1689627110249532 0.4755021448212844 0.2559161043870262  
0.9860007924281859 0.5696359718546802 0.6895909325222718  
0.0163921601114012 0.4326232618991384 0.3091193155281644  
0.1446979585098092 0.5881865073622663 0.7279305223391859  
0.8573990999766465 0.4137923865535527 0.2710972439617905  
0.1438454899967994 0.5648470255921723 0.8146302674102657

|                    |                    |                    |
|--------------------|--------------------|--------------------|
| 0.8574047200185078 | 0.4373861069535252 | 0.1844203033530789 |
| 0.9809584752806373 | 0.5968336208031957 | 0.6018107399355799 |
| 0.0223600860524087 | 0.4053368314848598 | 0.3968302720746806 |
| 0.9804926339662501 | 0.6284553508976316 | 0.5255604781473693 |
| 0.0235471929710016 | 0.3736841332776280 | 0.4730370282473118 |
| 0.8268865680121564 | 0.8083539315437491 | 0.6899652061213146 |
| 0.1834078680621190 | 0.1941031849365444 | 0.3104683137899471 |
| 0.6499057815660052 | 0.7886206538093106 | 0.6674135210426471 |
| 0.3606109060491889 | 0.2139998996703483 | 0.3326590521850150 |
| 0.6085796654779756 | 0.8119135599847027 | 0.5845890245364131 |
| 0.4031906201309994 | 0.1899526070985402 | 0.4153038922585495 |
| 0.7429326677817301 | 0.8555437826680361 | 0.5205668445747165 |
| 0.2698502129928073 | 0.1454999962293684 | 0.4795434538775751 |
| 0.9171680639849029 | 0.8740118686473934 | 0.5402445828770226 |
| 0.0953625357679329 | 0.1268989032387324 | 0.4602344230442625 |
| 0.9637620800627857 | 0.8516109241467049 | 0.6249624118642956 |
| 0.0475800670669031 | 0.1499563503958399 | 0.3757045831917125 |
| 0.1396809649638229 | 0.8731606050341298 | 0.6480204155749334 |
| 0.8713984630337919 | 0.1282380082164778 | 0.3530359917540764 |
| 0.1786198269294061 | 0.8527513787904226 | 0.7312927331823715 |
| 0.8310860862051399 | 0.1494506299486176 | 0.2699498738923580 |
| 0.0440182035392525 | 0.8089122591482578 | 0.7951804847865773 |
| 0.9646135121278832 | 0.1941780676410332 | 0.2058339660440325 |
| 0.8721467798362852 | 0.7870706320340304 | 0.7746995264732988 |
| 0.1368186177121373 | 0.2160619475125714 | 0.2259083611918697 |
| 0.5532864256376513 | 0.2229152774014551 | 0.6827709319014801 |
| 0.4511158314973116 | 0.7786018713355176 | 0.3165888298844308 |
| 0.6363158690510886 | 0.1607141457110259 | 0.6329287645100408 |
| 0.3696517104004116 | 0.8413005291151379 | 0.3664036427784154 |
| 0.6919851034375455 | 0.0647632356479804 | 0.6693053683305763 |
| 0.3140198854893725 | 0.9372338159842855 | 0.3299098709535073 |
| 0.6694346534832718 | 0.0275453839453661 | 0.7573383927902455 |
| 0.3350891227523149 | 0.9739854211319923 | 0.2417987056187130 |
| 0.5891366265336373 | 0.0860873747154542 | 0.8075480384055496 |
| 0.4137529541802323 | 0.9149101402529283 | 0.1916110101679465 |
| 0.5275664027359994 | 0.1842326203412270 | 0.7718458695482298 |
| 0.4751685276844597 | 0.8167551143932741 | 0.2274193918507095 |
| 0.4423577429024093 | 0.2457113707771512 | 0.8215675080673535 |
| 0.5589181251750546 | 0.7548117012091353 | 0.1777076232094785 |
| 0.3858376806242418 | 0.3415460288089278 | 0.7857225484052393 |
| 0.6156534012028843 | 0.6590731766690539 | 0.2136410504533544 |
| 0.4118824956628799 | 0.3798028011408476 | 0.6978751975790303 |
| 0.5911880113069614 | 0.6213197221763380 | 0.3015910562440993 |
| 0.4940611505613433 | 0.3217568708531715 | 0.6476343295799794 |
| 0.5104302011956747 | 0.6798035313043087 | 0.3518346024016807 |
| 0.8166336996395032 | 0.9927199905531694 | 0.1710303131753932 |
| 0.1849529508988752 | 0.0099065206244617 | 0.8283720488833382 |
| 0.8057066215271078 | 0.8916151985478962 | 0.3181585026202001 |
| 0.1973214370883127 | 0.1106722407701781 | 0.6811201472659363 |
| 0.1447882222896908 | 0.6751076394066757 | 0.2295616440654413 |
| 0.8570395611782260 | 0.3275000942196371 | 0.7685448552420766 |
| 0.1349308455677800 | 0.7836496230967356 | 0.0856860678693536 |
| 0.8653024694562319 | 0.2192294536489854 | 0.9126224344592941 |
| 0.7286391198580304 | 0.4748589273756352 | 0.8714541964401121 |
| 0.2718387544366578 | 0.5283226485512884 | 0.1268893126282507 |
| 0.7077055753970072 | 0.5102318836443445 | 0.7163334520091240 |
| 0.2942906859084999 | 0.4925555144632270 | 0.2819294324798349 |
| 0.2647666398680570 | 0.6228790581721313 | 0.6898784107946625 |

|                    |                    |                    |
|--------------------|--------------------|--------------------|
| 0.7377780850568456 | 0.3788173105063848 | 0.3093543072027245 |
| 0.2629452839503870 | 0.5795866914858152 | 0.8462365016456204 |
| 0.7380904320075103 | 0.4225146855868473 | 0.1530073371291678 |
| 0.6571710155194097 | 0.1907325690758910 | 0.5654967341462012 |
| 0.3500218635876493 | 0.8117307088943093 | 0.4339387770473166 |
| 0.7549320816931129 | 0.0172312160752810 | 0.6307744027302604 |
| 0.2523452529732566 | 0.9851326092936930 | 0.3684474637305044 |
| 0.7182154648330936 | 0.9530718360685100 | 0.7853867252645728 |
| 0.2865847935790100 | 0.0485222381980108 | 0.2136996653899246 |
| 0.5724488898078945 | 0.0577038719804861 | 0.8751750558643892 |
| 0.4294604051382649 | 0.9429393765316973 | 0.1239233926175913 |
| 0.4202677782849804 | 0.2151411576805629 | 0.8888481941951198 |
| 0.5798552810845052 | 0.7850055368097983 | 0.1103323091425708 |
| 0.3190723066423047 | 0.3870144409457410 | 0.8249499884086049 |
| 0.6813997692784497 | 0.6133024059024450 | 0.1743906194630682 |
| 0.3639378279907248 | 0.4547046912257571 | 0.6697510919446259 |
| 0.6392020019802089 | 0.5464658630306047 | 0.3297848508306700 |
| 0.5128285470927381 | 0.3507912191964877 | 0.5799212515884022 |
| 0.4928819531597028 | 0.6511751200831668 | 0.4196232361348393 |
| 0.9920641973551696 | 0.0938726056480945 | 0.5096048751615427 |
| 0.0211778766112261 | 0.9063788980655119 | 0.4910217113408351 |
| 0.3061051821782428 | 0.1273010177678415 | 0.5443188587440488 |
| 0.7076957114878653 | 0.8731601238393623 | 0.4556424797868743 |
| 0.5396741079509155 | 0.2056631660324015 | 0.4313398940461752 |
| 0.4723446507051037 | 0.7962458001409587 | 0.5682249071091690 |
| 0.4625565015411510 | 0.2486546573485668 | 0.2829453559810418 |
| 0.5471690099312312 | 0.7546588695742926 | 0.7169779558752225 |
| 0.2398655237164391 | 0.2499950877456456 | 0.1766641175548145 |
| 0.7683171470193457 | 0.7537342464120869 | 0.8237411605309362 |
| 0.9318812738277060 | 0.2103871523692860 | 0.1406492858052815 |
| 0.0756600679309045 | 0.7933302209517095 | 0.8604801423892425 |
| 0.6964808387166173 | 0.1304669759362866 | 0.2534337882220683 |
| 0.3129136907918237 | 0.8717966982578176 | 0.7481257112355024 |
| 0.7697172049525136 | 0.0921009873531702 | 0.4023218308078356 |
| 0.2422294015698299 | 0.9086122093948177 | 0.5989050003813716 |
| 0.4940949920006901 | 0.2389187420846639 | 0.0318877204911914 |
| 0.5066056291053940 | 0.7643470960724628 | 0.9669452870026944 |

2Ninaph HSLs

|                     |                     |                     |    |    |  |
|---------------------|---------------------|---------------------|----|----|--|
| 1.0000000000000000  |                     |                     |    |    |  |
| 7.2635505097251825  | -0.0185591948444922 | 0.0801032440006658  |    |    |  |
| -0.0070536494860078 | 13.4875463487865694 | 0.0323535482348631  |    |    |  |
| 2.4376497463097175  | 4.2548539987749594  | 15.6606145033734343 |    |    |  |
| Fe                  | N                   | C                   | H  | Ni |  |
| 2                   | 12                  | 76                  | 48 | 2  |  |

Direct

|                    |                    |                    |
|--------------------|--------------------|--------------------|
| 0.0000000000000000 | 0.0000000000000000 | 0.0000000000000000 |
| 0.0000000000555929 | 0.5000000000143601 | 0.0000000000000000 |
| 0.9742672148758302 | 0.9075581504846042 | 0.1157684378994617 |
| 0.0257327850584801 | 0.0924418495270842 | 0.8842315621323209 |
| 0.1753138668575005 | 0.0857957552938657 | 0.0258564745279912 |
| 0.8246861332298678 | 0.9142042148976088 | 0.9741435515033317 |
| 0.8101430456170533 | 0.3758458847699941 | 0.0269554355804686 |
| 0.1898569542973974 | 0.6241541152389516 | 0.9730445755758055 |
| 0.2211122616981172 | 0.3999979628094081 | 0.9983510535077471 |

|                    |                    |                    |
|--------------------|--------------------|--------------------|
| 0.7788877679975457 | 0.6000020074170891 | 0.0016489420742403 |
| 0.0027797859487393 | 0.5217550940645168 | 0.8639987601539616 |
| 0.9972202140385704 | 0.4782449059303460 | 0.1360012547528697 |
| 0.7980225774968730 | 0.0773350712989824 | 0.0329346436169331 |
| 0.2019774224833384 | 0.9226649436153025 | 0.9670653861649328 |
| 0.9505533002853284 | 0.9465769039573644 | 0.1844901252778683 |
| 0.0494466996407397 | 0.0534230848706159 | 0.8155099045675627 |
| 0.9452721193724187 | 0.8860442808225457 | 0.2671916368641192 |
| 0.0547278807050873 | 0.1139556968381470 | 0.7328083333540150 |
| 0.9666434162177850 | 0.7793200700713854 | 0.2813773632384269 |
| 0.0333565838755590 | 0.2206799299600206 | 0.7186226367297905 |
| 0.9862056182213763 | 0.7391707140688268 | 0.2096226750719197 |
| 0.0137943818381743 | 0.2608293157800290 | 0.7903773100212561 |
| 0.9890462337327719 | 0.8047453357549372 | 0.1288575952669504 |
| 0.0109537662406538 | 0.1952546940771143 | 0.8711424047012670 |
| 0.9720140451918269 | 0.7170101920156497 | 0.3644712545050766 |
| 0.0279859548626860 | 0.2829897781235786 | 0.6355287455267060 |
| 0.9799618601583973 | 0.6699185317826206 | 0.4386337525658632 |
| 0.0200381398491416 | 0.3300814682303113 | 0.5613662175886986 |
| 0.2983533205384390 | 0.1377962433319198 | 0.0330562178490439 |
| 0.7016466496369418 | 0.8622037417491910 | 0.9669437858697165 |
| 0.6828045563892289 | 0.3197242342248785 | 0.0308146160490921 |
| 0.3171954436017188 | 0.6802757657627581 | 0.9691853634500518 |
| 0.3269643202685373 | 0.3344137724213567 | 0.0130629766554051 |
| 0.6730356796061798 | 0.6655862276352664 | 0.9869370010002498 |
| 0.6700808770662192 | 0.1292754953290682 | 0.0401028030632844 |
| 0.3299191228872971 | 0.8707245344832728 | 0.9598971969685053 |
| 0.8487722226168373 | 0.5016166107965319 | 0.8334320203368151 |
| 0.1512277773704724 | 0.4983833891983522 | 0.1665679945700020 |
| 0.8419879112544564 | 0.5216538830822444 | 0.7466576136070699 |
| 0.1580120887855685 | 0.4783461169676215 | 0.2533424161748030 |
| 0.0010905444722837 | 0.5662731431249100 | 0.6867078142404921 |
| 0.9989094554819289 | 0.4337268569064960 | 0.3132921857277253 |
| 0.1615088321709379 | 0.5867491829920581 | 0.7191444033270997 |
| 0.8384911678690798 | 0.4132508170578006 | 0.2808556264547661 |
| 0.1558323999847460 | 0.5635882103605638 | 0.8069939576483875 |
| 0.8441676000555987 | 0.4364117896876465 | 0.1930060274447953 |
| 0.9971598788606215 | 0.5939039861773452 | 0.5981140454535918 |
| 0.0028401211796876 | 0.4060960138007133 | 0.4018859843282883 |
| 0.9898276343034311 | 0.6261494010545334 | 0.5214730143170812 |
| 0.0101723656308792 | 0.3738505989571479 | 0.4785269857147014 |
| 0.0443797747387720 | 0.1536845222821839 | 0.3770445024165099 |
| 0.9556202253089552 | 0.8463154627748111 | 0.6229554678016314 |
| 0.0764488656020177 | 0.1279932553317309 | 0.4631261335343240 |
| 0.9235511344522109 | 0.8720067148793049 | 0.5368738664974657 |
| 0.2474560162628805 | 0.1506966014896278 | 0.4821925223996644 |
| 0.7525439837706500 | 0.8493034134061901 | 0.5178074775685459 |
| 0.3924987263546527 | 0.2018800213376437 | 0.4161274121603569 |
| 0.6075012735202563 | 0.7981199638293219 | 0.5838725878078677 |
| 0.3654715846689669 | 0.2282019350174025 | 0.3319610164545495 |
| 0.6345284152845423 | 0.7717980947949385 | 0.6680389835772331 |
| 0.1924587586532240 | 0.2043247488958642 | 0.3100271394664915 |
| 0.8075412413803065 | 0.7956752659999609 | 0.6899728605017188 |
| 0.1614280966815969 | 0.2299799972848291 | 0.2239762269149352 |
| 0.8385719033125412 | 0.7700199878624474 | 0.7760237731168544 |
| 0.9920385225069879 | 0.2066159717716332 | 0.2040280130400873 |
| 0.0079614773483030 | 0.7933840133038217 | 0.7959719869917024 |
| 0.8465013001396571 | 0.1551943665965752 | 0.2698769887206822 |



0.1534986997348469 0.8448056482795323 0.7301230113110933  
0.8720520605041671 0.1293810771858475 0.3543705565744375  
0.1279479395094540 0.8706189376902671 0.6456294434573451  
0.5461950488100200 0.2150880331032141 0.6735451881925911  
0.4538049512374229 0.7849119520255812 0.3264547820255430  
0.5968055388970868 0.1406756519752932 0.6278267157246304  
0.4031944611698606 0.8593243628823402 0.3721732544935037  
0.6260895924640124 0.0406869184897474 0.6704697918133107  
0.3739104074684008 0.9593131001934694 0.3295301783412512  
0.6074241023591966 0.0111309878667356 0.7608963110261655  
0.3925758976014038 0.9888689841945251 0.2391037038806587  
0.5623566732282441 0.0821079153404156 0.8071383956623635  
0.4376433268910844 0.9178920995738764 0.1928616341195024  
0.5308788593309259 0.1851898853438101 0.7650304053379031  
0.4691211406303992 0.8148100997681667 0.2349695797552727  
0.4832125382830412 0.2598038832762199 0.8107663057237033  
0.5167874915289374 0.7401961465545881 0.1892337241217348  
0.4480341326454607 0.3587814125674100 0.7688811861536351  
0.5519658971678396 0.6412185874089928 0.2311187989395407  
0.4609366647767104 0.3880115229387897 0.6786013548408292  
0.5390633352308356 0.6119884770741493 0.3213986153137469  
0.5105554982656670 0.3178128921912986 0.6320406505073919  
0.4894445017554432 0.6821870779861214 0.3679593792744811  
0.9390256416328242 0.0290891273193949 0.1710657554403809  
0.0609743583954057 0.9709108493544250 0.8289342445914087  
0.9303817335130873 0.9219249924673960 0.3197300226158433  
0.0696182664603384 0.0780750373646484 0.6802699773523884  
0.0007542151478077 0.6574241434940049 0.2171301783720949  
0.9992457848733309 0.3425758267535528 0.7828698067210809  
0.0041979573330622 0.7761017266806007 0.0723867654356951  
0.9958020425749368 0.2238982584498430 0.9276132494711220  
0.7281538348512626 0.4678782259011456 0.8811538958681595  
0.2718461650694550 0.5321218038759099 0.1188460892250163  
0.7159318955273264 0.5027324719911306 0.7251323566388592  
0.2840681044603102 0.4972675280020908 0.2748676135792749  
0.2867420012223079 0.6224444320992362 0.6757830996212917  
0.7132579988710290 0.3775555679321627 0.3242169003469257  
0.2756928203478068 0.5803638403495199 0.8341560825544292  
0.7243071796597391 0.4196361596634048 0.1658438876001398  
0.9637023156896873 0.0902019001288252 0.5139147869734302  
0.0362976843137872 0.9097981222351166 0.4860852129947872  
0.2714332411493814 0.1310422825115793 0.5481685076240552  
0.7285667588240443 0.8689577473204722 0.4518314923441693  
0.5260276897938070 0.2206413209502003 0.4319202685877244  
0.4739723101607041 0.7793586790093840 0.5680797313804860  
0.4765471345450862 0.2675808184777893 0.2807344067863511  
0.5234528654425432 0.7324191815154535 0.7192655634317831  
0.2738682451350556 0.2692195308484031 0.1736088638070044  
0.7261317549042587 0.7307804989824049 0.8263911660384267  
0.9701865595446648 0.2275156766541144 0.1377518371597830  
0.0298134404621706 0.7724843531397525 0.8622481330583369  
0.7145448660039335 0.1347795134525782 0.2535205722933398  
0.2854551339344411 0.8652204642081003 0.7464793979247943  
0.7610499120611678 0.0884294514829733 0.4048854002338942  
0.2389500878440884 0.9115705261440823 0.5951145997343303  
0.6134559878157262 0.1640236038690119 0.5582323296640226  
0.3865440121576995 0.8359764259630467 0.4417676703041877  
0.6641872176948524 0.9842442457480800 0.6347258195362286

|                    |                    |                    |
|--------------------|--------------------|--------------------|
| 0.3358127821776193 | 0.0157557696306867 | 0.3652741804955610 |
| 0.6323663536719764 | 0.9324806777785852 | 0.7938700010865176 |
| 0.3676336463724041 | 0.0675192998484704 | 0.2061299988816998 |
| 0.5500681346384582 | 0.0598211961290218 | 0.8765444738754624 |
| 0.4499318653258939 | 0.9401787964145498 | 0.1234555261563344 |
| 0.4713378628266227 | 0.2366600829425920 | 0.8802232070201867 |
| 0.5286621669795721 | 0.7633399319532259 | 0.1197767929480307 |
| 0.4065780665446752 | 0.4138509582175871 | 0.8056589254457833 |
| 0.5934219035447654 | 0.5861490120102602 | 0.1943410597109505 |
| 0.4307459430033020 | 0.4660005479988527 | 0.6458291187516068 |
| 0.5692540570042368 | 0.5339994520140792 | 0.3541708514029622 |
| 0.5210511751047022 | 0.3401593939802225 | 0.5625501964146835 |
| 0.4789488248687235 | 0.6598406358518218 | 0.4374498035535268 |
| 0.4909533154330390 | 0.2294212444125847 | 0.0338602338597056 |
| 0.5090467143665123 | 0.7705787704943958 | 0.9661397475464923 |

**2Ninaph LSLS**

|                     |                     |                     |
|---------------------|---------------------|---------------------|
| 1.0000000000000000  |                     |                     |
| 7.1387826389432805  | -0.0133916622167724 | 0.0121175560757374  |
| -0.0290740227622939 | 13.3456145945846316 | 0.0168769565839647  |
| -1.8321513423066271 | -4.6386426849151912 | 15.6110445576935266 |

|    |    |    |    |    |  |
|----|----|----|----|----|--|
| Fe | N  | C  | H  | Ni |  |
| 2  | 12 | 76 | 48 | 2  |  |

Direct

|                    |                    |                    |
|--------------------|--------------------|--------------------|
| 0.0000000000000000 | 0.0000000000000000 | 0.0000000000000000 |
| 0.0000000000070912 | 0.4999999999636842 | 0.0000000000000000 |
| 0.9791386278211860 | 0.9062229263209503 | 0.8828268078082502 |
| 0.0208613722494491 | 0.0937770587759701 | 0.1171731921534516 |
| 0.8204129516659506 | 0.9125915424300786 | 0.0255991664158373 |
| 0.1795870484282531 | 0.0874084650600011 | 0.9744008336096925 |
| 0.0063882370847992 | 0.5236026549668580 | 0.1247392506664511 |
| 0.9936117629995493 | 0.4763973747991912 | 0.8752607492952507 |
| 0.8027397650192682 | 0.5963272127958419 | 0.0049716777441944 |
| 0.1972602349305959 | 0.4036727872130825 | 0.9950283222813354 |
| 0.8170543454349755 | 0.3908660591620361 | 0.9818164070274662 |
| 0.1829456546569332 | 0.6091339408468741 | 0.0181835929980636 |
| 0.2006391091500035 | 0.9191737214614051 | 0.0292940559443977 |
| 0.7993608907923146 | 0.0808263083046370 | 0.9707059440173040 |
| 0.9549469115549485 | 0.9462569358372406 | 0.8154279850341624 |
| 0.0450530884006355 | 0.0537430827656493 | 0.1845720149913674 |
| 0.9489296836063801 | 0.8850625848133689 | 0.7315147520168779 |
| 0.0510703163199011 | 0.1149373928023820 | 0.2684852479448239 |
| 0.9704297981870695 | 0.7764375629309441 | 0.7144929520374674 |
| 0.0295702017627946 | 0.2235624370779661 | 0.2855070479880695 |
| 0.9918846547269098 | 0.7352452525155968 | 0.7849883837020357 |
| 0.0081153453482870 | 0.2647547474710237 | 0.2150116162596660 |
| 0.9948763676048884 | 0.8015852245531931 | 0.8671290944361800 |
| 0.0051236324778614 | 0.1984147456763026 | 0.1328709055893569 |
| 0.9748327983355125 | 0.7138521519355550 | 0.6296886682002167 |
| 0.0251672017488715 | 0.2861478779031188 | 0.3703113317614850 |
| 0.9840529184124733 | 0.6674911535905679 | 0.5541604921651100 |
| 0.0159470816794283 | 0.3325088464183494 | 0.4458395078604269 |
| 0.6980404742275468 | 0.8571113752460136 | 0.0317443018070946 |
| 0.3019595258552101 | 0.1428885949834822 | 0.9682556982184423 |
| 0.6894021377391439 | 0.3319068821206130 | 0.9747616587748382 |

|                    |                    |                    |
|--------------------|--------------------|--------------------|
| 0.3105978622107273 | 0.6680931178883043 | 0.0252383412506916 |
| 0.6833899487584674 | 0.6576169445521245 | 0.0144964054443832 |
| 0.3166100511746990 | 0.3423830554345031 | 0.9855035945173185 |
| 0.3253323702791562 | 0.8636617163825520 | 0.0357479510366261 |
| 0.6746676296661320 | 0.1363382687366581 | 0.9642520489889108 |
| 0.8484486957418795 | 0.5095709362816763 | 0.1597449556564641 |
| 0.1515513041988328 | 0.4904290339478194 | 0.8402550443690657 |
| 0.8451460312313728 | 0.5286788686422810 | 0.2470787853229552 |
| 0.1548539687276502 | 0.4713211611460508 | 0.7529212147025746 |
| 0.0097912020059070 | 0.5670471485940212 | 0.3035185567621284 |
| 0.9902087979272522 | 0.4329528513926064 | 0.6964814431995663 |
| 0.1728402618632927 | 0.5819182743464708 | 0.2664729615971311 |
| 0.8271597380865714 | 0.4180817256624394 | 0.7335270384283987 |
| 0.1658275668937819 | 0.5588638105831905 | 0.1782504604830777 |
| 0.8341724330393703 | 0.4411361894034371 | 0.8217495394786170 |
| 0.0072920297498555 | 0.5937977732174460 | 0.3928419169733672 |
| 0.9927079703329014 | 0.4062021970120426 | 0.6071580830521697 |
| 0.9966358981551977 | 0.6246114170052692 | 0.4701975056688923 |
| 0.0033641019458770 | 0.3753886128556800 | 0.5298024943566375 |
| 0.9567652746464361 | 0.8469256369473541 | 0.3758782260717979 |
| 0.0432347254408896 | 0.1530743481718631 | 0.6241217739537319 |
| 0.9192599879089443 | 0.8712954474853234 | 0.4625494535027173 |
| 0.0807400120409270 | 0.1287045525236010 | 0.5374505465228196 |
| 0.7450542594124698 | 0.8473641281779081 | 0.4827655651942493 |
| 0.2549457406840219 | 0.1526358867207236 | 0.5172344348312947 |
| 0.6018078503438105 | 0.7964054989506621 | 0.4171626338738079 |
| 0.3981921496014778 | 0.2035944861685479 | 0.5828373661517219 |
| 0.6336408039169754 | 0.7722146624577135 | 0.3324359095547678 |
| 0.3663591961627901 | 0.2277853524186213 | 0.6675640904069269 |
| 0.8101291385646618 | 0.7971978578053864 | 0.3094318016443580 |
| 0.1898708615272469 | 0.2028021422035309 | 0.6905681983811647 |
| 0.8460628818692726 | 0.7728958697100410 | 0.2227587531256887 |
| 0.1539371182013483 | 0.2271041153868794 | 0.7772412468360130 |
| 0.0193707118827362 | 0.7962713690393244 | 0.2017335148736947 |
| 0.9806292880762726 | 0.2037286607490145 | 0.7982664851518422 |
| 0.1635124791601257 | 0.8470734744745556 | 0.2670595225082621 |
| 0.8364875209196541 | 0.1529265404017934 | 0.7329404774534467 |
| 0.1329246499442647 | 0.8718366199990157 | 0.3520926435319041 |
| 0.8670753499889088 | 0.1281633799876261 | 0.6479073564297977 |
| 0.4466185200858632 | 0.7810716136031104 | 0.6729529167341539 |
| 0.5533814800060455 | 0.2189283864058069 | 0.3270470832913688 |
| 0.3948820666351125 | 0.8549597669610733 | 0.6277113667027479 |
| 0.6051179333101828 | 0.1450402181581296 | 0.3722886333227819 |
| 0.3738309074610839 | 0.9585187903928301 | 0.6708819003254263 |
| 0.6261690924743775 | 0.0414812170749670 | 0.3291180996362755 |
| 0.4016762963802236 | 0.9922933151977702 | 0.7614949110623570 |
| 0.5983237035494966 | 0.0077066736034226 | 0.2385050888993447 |
| 0.4473977071646189 | 0.9219714185709904 | 0.8074808229035000 |
| 0.5526022927898282 | 0.0780285963276270 | 0.1925191771220369 |
| 0.4709931616343042 | 0.8152885674972836 | 0.7647532186568924 |
| 0.5290068384500373 | 0.1847114622687656 | 0.2352467813048094 |
| 0.5181647440284891 | 0.7411091815726891 | 0.8101633456332777 |
| 0.4818352560725643 | 0.2588908482156285 | 0.1898366543922521 |
| 0.5443121336470682 | 0.6383507917740374 | 0.7673392887890316 |
| 0.4556878662769179 | 0.3616491783605440 | 0.2326607111726702 |
| 0.5234473421397183 | 0.6048268163716557 | 0.6766002081352411 |
| 0.4765526578193047 | 0.3951732134166761 | 0.3233997918902958 |
| 0.4739939718119714 | 0.6746418996291936 | 0.6305388673042742 |

|                    |                    |                    |
|--------------------|--------------------|--------------------|
| 0.5260060282799373 | 0.3253581003797166 | 0.3694611327212556 |
| 0.9432606136211490 | 0.0301801833513053 | 0.8308154998654587 |
| 0.0567393864776307 | 0.9698198390284887 | 0.1691845001600711 |
| 0.9323372868750255 | 0.9218676274878561 | 0.6800572408894539 |
| 0.0676627132070280 | 0.0781323947970094 | 0.3199427590722408 |
| 0.0075826742891181 | 0.6520778108624441 | 0.7755037515871024 |
| 0.9924173257936388 | 0.3479221593670587 | 0.2244962484384416 |
| 0.0108869975079955 | 0.7720938151189713 | 0.9226549913780460 |
| 0.9891130026077448 | 0.2279061700002458 | 0.0773450086474980 |
| 0.7229970943630448 | 0.4819975062554036 | 0.1152210197460448 |
| 0.2770029055868264 | 0.5180024937535137 | 0.8847789802794708 |
| 0.7161346730050013 | 0.5143578328914060 | 0.2718236547617181 |
| 0.2838653270960450 | 0.4856421968969258 | 0.7281763452638117 |
| 0.3029193009284299 | 0.6128256607956786 | 0.3066904295285298 |
| 0.6970806991634788 | 0.3871743392132316 | 0.6933095704969929 |
| 0.2885909774170230 | 0.5702869514616964 | 0.1479669731512629 |
| 0.7114090225419858 | 0.4297130783266283 | 0.8520330268742669 |
| 0.0306514498722308 | 0.9088709350825610 | 0.5128843672475440 |
| 0.9693485500517767 | 0.0911290351246592 | 0.4871156327141506 |
| 0.7172060132862796 | 0.8656953915167165 | 0.5492006437464028 |
| 0.2827939866681675 | 0.1343046233819010 | 0.4507993562791270 |
| 0.4659660591737875 | 0.7760666259676654 | 0.4336648557019842 |
| 0.5340339409226900 | 0.2239333889309520 | 0.5663351443235527 |
| 0.5237190281810555 | 0.7337223607340206 | 0.2814787070278939 |
| 0.4762809718941341 | 0.2662776392526069 | 0.7185212929338078 |
| 0.7344956066360240 | 0.7347055666088309 | 0.1727407738759936 |
| 0.2655043933138401 | 0.2652944334000793 | 0.8272592261495362 |
| 0.0451230618375931 | 0.7763182157703596 | 0.1349831430048525 |
| 0.9548769381001563 | 0.2236817991059823 | 0.8650168569568635 |
| 0.2979325151783172 | 0.8684236122902078 | 0.2498541124333045 |
| 0.7020674847646760 | 0.1315763653478328 | 0.7501458875922253 |
| 0.2428329646683807 | 0.9123805729434764 | 0.4022149619025583 |
| 0.7571670354068161 | 0.0876194270431512 | 0.5977850380591363 |
| 0.3702325619123101 | 0.8282548637100504 | 0.5581345681127559 |
| 0.6297674381750227 | 0.1717451214091597 | 0.4418654319127739 |
| 0.3347659678338033 | 0.0144621125856617 | 0.6354387423470342 |
| 0.6652340321188532 | 0.9855378965023434 | 0.3645612576784956 |
| 0.3822341760047365 | 0.0736561370104170 | 0.7950990919488845 |
| 0.6177658239542936 | 0.9263438927779006 | 0.2049009080766524 |
| 0.4660040809526507 | 0.9474595067730149 | 0.8771100254324082 |
| 0.5339959191346750 | 0.0525404783461880 | 0.1228899745931358 |
| 0.5363201222578340 | 0.7673925311894862 | 0.8798712752153222 |
| 0.4636798776828641 | 0.2326074389673778 | 0.1201287248102147 |
| 0.5846190675529499 | 0.5834362290420572 | 0.8036523026486435 |
| 0.4153809325222468 | 0.4165637709445704 | 0.1963476973130582 |
| 0.5465215721270766 | 0.5237591175741514 | 0.6428830532056651 |
| 0.4534784278227946 | 0.4762408824347588 | 0.3571169468198647 |
| 0.4560559810479674 | 0.6489914267360106 | 0.5607217509109077 |
| 0.5439440188851847 | 0.3510085732506170 | 0.4392782490507869 |
| 0.5059025084853914 | 0.7624618221905095 | 0.0309853625713785 |
| 0.4940974916110932 | 0.2375381927081008 | 0.9690146374541584 |

2Pdnaph

|                     |                     |                     |
|---------------------|---------------------|---------------------|
| 1.0000000000000000  |                     |                     |
| 7.5270137830788810  | -0.0371087142834050 | -0.0524226009812228 |
| -0.0801671209892343 | 13.9527771939873233 | 0.1198741358483286  |
| -1.5359932700484467 | -3.3435572756055754 | 15.5412546651600660 |
| Pd                  | Fe                  | N C H               |

|                    | 2 | 2 | 12 | 76                 | 48                 |
|--------------------|---|---|----|--------------------|--------------------|
| Direct             |   |   |    |                    |                    |
| 0.9926504284499913 |   |   |    | 0.2373968512021065 | 0.4642318776978627 |
| 0.0073495715454897 |   |   |    | 0.7626031637451618 | 0.5357680925104944 |
| 0.4999999999425242 |   |   |    | 0.9999999999787406 | 0.5000000000127187 |
| 0.4999999999891500 |   |   |    | 0.5000000000171170 | 0.5000000000127187 |
| 0.5258680800078039 |   |   |    | 0.1052219133269645 | 0.6190624184469868 |
| 0.4741319199505725 |   |   |    | 0.8947780792245013 | 0.3809375815148712 |
| 0.6660441490026727 |   |   |    | 0.0906668644932296 | 0.4500498557091603 |
| 0.3339558509850349 |   |   |    | 0.9093331429172906 | 0.5499501144991896 |
| 0.3282215891869598 |   |   |    | 0.3783740776024160 | 0.4825918221513703 |
| 0.6717784109551772 |   |   |    | 0.6216259522298699 | 0.5174081778740600 |
| 0.7221476211978413 |   |   |    | 0.4082772263527588 | 0.4997927194023575 |
| 0.2778523788111968 |   |   |    | 0.5917228034795272 | 0.5002072806230657 |
| 0.5015860444007529 |   |   |    | 0.5182342803669115 | 0.6365788202771725 |
| 0.4984139555775471 |   |   |    | 0.4817657196673295 | 0.3634211797482578 |
| 0.2756455562007787 |   |   |    | 0.0727877686451706 | 0.4566684992722472 |
| 0.7243544437575267 |   |   |    | 0.9272122238365128 | 0.5433315006896109 |
| 0.5587447851899938 |   |   |    | 0.0703255429237188 | 0.6917162090974500 |
| 0.4412552149136246 |   |   |    | 0.9296744495737741 | 0.3082837909279803 |
| 0.5600591467461840 |   |   |    | 0.1287073587488692 | 0.7729326841446778 |
| 0.4399408532167044 |   |   |    | 0.8712926263514547 | 0.2270673158807597 |
| 0.5252597512401493 |   |   |    | 0.2288913337648069 | 0.7801731875658859 |
| 0.4747402487259293 |   |   |    | 0.7711086662536175 | 0.2198268123959721 |
| 0.4944685272058322 |   |   |    | 0.2651668705177244 | 0.7039522481829010 |
| 0.5055315026170177 |   |   |    | 0.7348331593145616 | 0.2960477518425293 |
| 0.4958866111620353 |   |   |    | 0.2013545436387147 | 0.6253553922596069 |
| 0.5041133888347957 |   |   |    | 0.7986454861777545 | 0.3746446077022441 |
| 0.5198942634229908 |   |   |    | 0.2893416111079077 | 0.8619283047125990 |
| 0.4801057365737620 |   |   |    | 0.7106584186387863 | 0.1380716952492591 |

2Pdnaph HSHS

|                     |    |    |    |                     |                     |
|---------------------|----|----|----|---------------------|---------------------|
| 1.0000000000000000  |    |    |    |                     |                     |
| 7.5270137830788810  |    |    |    | -0.0371087142834050 | -0.0524226009812228 |
| -0.0801671209892343 |    |    |    | 13.9527771939873233 | 0.1198741358483286  |
| -1.5359932700484467 |    |    |    | -3.3435572756055754 | 15.5412546651600660 |
| Pd                  | Fe | N  | C  | H                   |                     |
| 2                   | 2  | 12 | 76 | 48                  |                     |
| Direct              |    |    |    |                     |                     |
| 0.9926504284499913  |    |    |    | 0.2373968512021065  | 0.4642318776978627  |
| 0.0073495715454897  |    |    |    | 0.7626031637451618  | 0.5357680925104944  |
| 0.4999999999425242  |    |    |    | 0.9999999999787406  | 0.5000000000127187  |
| 0.4999999999891500  |    |    |    | 0.5000000000171170  | 0.5000000000127187  |
| 0.5258680800078039  |    |    |    | 0.1052219133269645  | 0.6190624184469868  |
| 0.4741319199505725  |    |    |    | 0.8947780792245013  | 0.3809375815148712  |
| 0.6660441490026727  |    |    |    | 0.0906668644932296  | 0.4500498557091603  |
| 0.3339558509850349  |    |    |    | 0.9093331429172906  | 0.5499501144991896  |
| 0.3282215891869598  |    |    |    | 0.3783740776024160  | 0.4825918221513703  |
| 0.6717784109551772  |    |    |    | 0.6216259522298699  | 0.5174081778740600  |
| 0.7221476211978413  |    |    |    | 0.4082772263527588  | 0.4997927194023575  |
| 0.2778523788111968  |    |    |    | 0.5917228034795272  | 0.5002072806230657  |
| 0.5015860444007529  |    |    |    | 0.5182342803669115  | 0.6365788202771725  |
| 0.4984139555775471  |    |    |    | 0.4817657196673295  | 0.3634211797482578  |
| 0.2756455562007787  |    |    |    | 0.0727877686451706  | 0.4566684992722472  |
| 0.7243544437575267  |    |    |    | 0.9272122238365128  | 0.5433315006896109  |
| 0.5587447851899938  |    |    |    | 0.0703255429237188  | 0.6917162090974500  |
| 0.4412552149136246  |    |    |    | 0.9296744495737741  | 0.3082837909279803  |

|                    |                    |                    |
|--------------------|--------------------|--------------------|
| 0.5600591467461840 | 0.1287073587488692 | 0.7729326841446778 |
| 0.4399408532167044 | 0.8712926263514547 | 0.2270673158807597 |
| 0.5252597512401493 | 0.2288913337648069 | 0.7801731875658859 |
| 0.4747402487259293 | 0.7711086662536175 | 0.2198268123959721 |
| 0.4944685272058322 | 0.2651668705177244 | 0.7039522481829010 |
| 0.5055315026170177 | 0.7348331593145616 | 0.2960477518425293 |
| 0.4958866111620353 | 0.2013545436387147 | 0.6253553922596069 |
| 0.5041133888347957 | 0.7986454861777545 | 0.3746446077022441 |
| 0.5198942634229908 | 0.2893416111079077 | 0.8619283047125990 |
| 0.4801057365737620 | 0.7106584186387863 | 0.1380716952492591 |
| 0.5138281197761714 | 0.3360787185351413 | 0.9353258359846706 |
| 0.4861718801591692 | 0.6639212516852311 | 0.0646741639771804 |
| 0.7879559083445642 | 0.1449749638118689 | 0.4538547835659443 |
| 0.2120440916508457 | 0.8550250510656099 | 0.5461451866424127 |
| 0.2005265066334232 | 0.3271644556479956 | 0.4752453616224273 |
| 0.7994734934349239 | 0.6728355145025944 | 0.5247546383394237 |
| 0.8253021879887612 | 0.3462502549476696 | 0.4850799429450774 |
| 0.1746978119913081 | 0.6537497450656744 | 0.5149200272632797 |
| 0.1644180946232865 | 0.1306278593299979 | 0.4537146853080074 |
| 0.8355819053549354 | 0.8693721406344608 | 0.5462853147174229 |
| 0.3529324216115057 | 0.5007965201531803 | 0.6726686728976290 |
| 0.6470675783545019 | 0.4992034797954688 | 0.3273313270642291 |
| 0.3462181392720964 | 0.5179873446760226 | 0.7608487450721597 |
| 0.6537818905077017 | 0.4820126552726123 | 0.2391512548896984 |
| 0.4993983736441052 | 0.5573425328038155 | 0.8159163674344256 |
| 0.5006016264672155 | 0.4426574671606431 | 0.1840836325909976 |
| 0.6548852294648313 | 0.5739575688023635 | 0.7777082258270624 |
| 0.3451147705012474 | 0.4260424312160538 | 0.2222917741347956 |
| 0.6500547722499590 | 0.5532926708279646 | 0.6889772145801984 |
| 0.3499452278613617 | 0.4467073291364798 | 0.3110227854452319 |
| 0.4963635168622531 | 0.5847560854259015 | 0.9054177347166430 |
| 0.5036364831038256 | 0.4152439145925229 | 0.0945822652452080 |
| 0.4931972437005783 | 0.6187575514551895 | 0.9823476339595771 |
| 0.5068027860792981 | 0.3812424485632349 | 0.0176523660022738 |
| 0.4569482499966213 | 0.1726087699688819 | 0.2507724636255588 |
| 0.5430517797972598 | 0.8273912300444621 | 0.7492275065827982 |
| 0.3076110857570455 | 0.1204370722502190 | 0.2065141359390239 |
| 0.6923889143114792 | 0.8795629575148283 | 0.7934858789631534 |
| 0.2959876705571816 | 0.0891686104300504 | 0.1160272971353891 |
| 0.7040123592272067 | 0.9108313821372320 | 0.8839727028900413 |
| 0.4329864712966227 | 0.1113665680688527 | 0.0709168432863123 |
| 0.5670135585491067 | 0.8886334244800693 | 0.9290831417987917 |
| 0.6022274099514817 | 0.1941317734039174 | 0.2064015644659065 |
| 0.3977725901476958 | 0.8058682266144999 | 0.7935984354959515 |
| 0.7598873528163352 | 0.2447400290710817 | 0.2504212236138983 |
| 0.2401126471790747 | 0.7552599858063971 | 0.7495787465944517 |
| 0.8984469229596144 | 0.2656362183872787 | 0.2058604267027988 |
| 0.1015530770492603 | 0.7343637518305570 | 0.7941395583823052 |
| 0.8854886241583344 | 0.2364592833154546 | 0.1152804406893821 |
| 0.1145113758413601 | 0.7635407018184921 | 0.8847195518976747 |
| 0.7350923338488968 | 0.1856542783310218 | 0.0706312542078678 |
| 0.2649076662410934 | 0.8143457366035136 | 0.9293687532559431 |
| 0.5897972536663616 | 0.1634284090972429 | 0.1146878515464849 |
| 0.4102027462996460 | 0.8365715908513920 | 0.8853121484153661 |
| 0.0467101608642935 | 0.2113766701770246 | 0.8306144396215345 |
| 0.9532898353718622 | 0.7886233149232993 | 0.1693855604039030 |
| 0.0993515854992353 | 0.1399394659575321 | 0.8795537959766619 |
| 0.9006484293583270 | 0.8600605191269750 | 0.1204462039851890 |

0.1336991195386616 0.0457444749806157 0.8393161513588865  
0.8663008656927715 0.9542555511530821 0.1606838486665509  
0.1173559930044874 0.0190178554608877 0.7483644206187208  
0.8826440069500094 0.9809821333222075 0.2516355793431373  
0.0674592367599729 0.0868305885206198 0.6990249234347630  
0.9325407706825288 0.9131694337591085 0.3009750765271022  
0.0306888537867778 0.1840876000658156 0.7384974998914515  
0.9693111312999605 0.8159124148325674 0.2615025001339859  
0.9778593527251971 0.2553310023605917 0.6896213989383213  
0.0221406212683704 0.7446689678756044 0.3103786010871090  
0.9414645708987450 0.3491867169768312 0.7292570778712530  
0.0585354141725745 0.6508132829876274 0.2707429221541773  
0.9570733210708227 0.3761133729224895 0.8201665020168036  
0.0429266509569644 0.6238866270419692 0.1798334980086267  
0.0093252888409268 0.3086661420471941 0.8695900396920564  
0.9906746907734814 0.6913338579870398 0.1304099603333739  
0.5829318056808148 0.9926600684941036 0.6831659630988511  
0.4170681942916517 0.0073399258875781 0.3168340369265863  
0.5854686166582042 0.0969378058344716 0.8296158148399329  
0.4145313833354294 0.9030622090639042 0.1703841851854975  
0.4687317644905562 0.3419640627616900 0.7066809516525367  
0.5312682354877438 0.6580359372725439 0.2933190483728936  
0.4722964142795263 0.2266965773048000 0.5652391274452526  
0.5277036155279049 0.7733034375935546 0.4347608725801777  
0.2368329569232870 0.4718587077218146 0.6282067007697947  
0.7631670431573596 0.5281412625143744 0.3717932992556356  
0.2243893851603929 0.5018904623161475 0.7870454389651940  
0.7756106446316196 0.4981095376483111 0.2129545610602364  
0.7756582401079584 0.6044886501978155 0.8176699409699282  
0.2243417598581203 0.3955113498206089 0.1823300589919299  
0.7663854269773864 0.5663351138525385 0.6571734646269718  
0.2336145729886923 0.4336648861658858 0.3428265353348792  
0.4667146211175535 0.1968814194210111 0.3203627518015324  
0.5332854086898777 0.8031185954773576 0.6796372482239050  
0.1975803639996911 0.1033041329684394 0.2408727762632381  
0.8024196210581493 0.8966958521807697 0.7591271939451119  
0.1771071572055334 0.0480857750009989 0.0822306189912680  
0.8228928130264492 0.9519142547951205 0.9177693735957888  
0.4232883895591470 0.0886269001875206 0.0012241611301249  
0.5767116401634738 0.9113731147680042 0.9987758155629649  
0.7696505187236440 0.2670666898987619 0.3201106431509615  
0.2303494812238966 0.7329332803374271 0.6798893568744759  
0.0191236727243265 0.3036134263371153 0.2408600728088501  
0.9808763272844701 0.6963865438109309 0.7591399122762397  
0.9961625000198353 0.2527293015197429 0.0808839661337828  
0.0038374999002500 0.7472707133811696 0.9191160487684016  
0.7249806095367504 0.1627596924691943 0.0009105682457999  
0.2750193905173148 0.8372403224323648 0.9990894085108692  
0.1134158917006687 0.1608871646094130 0.9494579231718348  
0.8865841082807506 0.8391128502731320 0.0505420767900304  
0.1743102948335036 0.9912317640216415 0.8770159949855341  
0.8256897200675368 0.0087682513652254 0.1229840050398963  
0.1460631178504386 0.9448220498047206 0.7176330910128925  
0.8539368970302377 0.0551779576806624 0.2823669089489584  
0.0554235942385617 0.0664638251232859 0.6291646173557197  
0.9445764094818685 0.9335361898448724 0.3708353826697106  
0.9649807791342226 0.2342365809515954 0.6196465374944538  
0.0350192209463458 0.7657633892148112 0.3803534625309766

|                    |                    |                    |
|--------------------|--------------------|--------------------|
| 0.8980837818839547 | 0.4021452287172735 | 0.6903878471414160 |
| 0.1019162256501360 | 0.5978547415189155 | 0.3096121528840143 |
| 0.9259755808623211 | 0.4500202995992524 | 0.8511811736890635 |
| 0.0740244153462157 | 0.5499796705513376 | 0.1488188262727945 |
| 0.0213961082065310 | 0.3291669917340130 | 0.9395742729364898 |
| 0.9786039029396605 | 0.6708330082146290 | 0.0604257270253683 |

2Pdnaph HSLs

|                     |                     |                     |    |    |  |
|---------------------|---------------------|---------------------|----|----|--|
| 1.0000000000000000  |                     |                     |    |    |  |
| 7.4243453792768497  | -0.0087605337649141 | 0.0587699792335427  |    |    |  |
| -0.0021145541973852 | 13.7342920461770319 | -0.0699936349285702 |    |    |  |
| 2.2980556120933247  | 4.0966796920094097  | 15.5751583954199475 |    |    |  |
| Pd                  | Fe                  | N                   | C  | H  |  |
| 2                   | 2                   | 12                  | 76 | 48 |  |

Direct

|                    |                    |                    |
|--------------------|--------------------|--------------------|
| 0.4917690224796445 | 0.2292742908464476 | 0.0354613740777125 |
| 0.5082310073439515 | 0.7707257240387335 | 0.9645386259733257 |
| 0.0000000000000000 | 0.0000000000000000 | 0.0000000000000000 |
| 0.0000000000542073 | 0.5000000000000000 | 0.0000000000000000 |
| 0.0224874672088760 | 0.0920498400588201 | 0.8850873014869833 |
| 0.9775125327675269 | 0.9079501450056213 | 0.1149126910348386 |
| 0.1696257197042002 | 0.0835516551343005 | 0.0286847883397812 |
| 0.8303742951035460 | 0.9164483671995285 | 0.9713152041820408 |
| 0.2206077754654387 | 0.4046061686163469 | 0.9989990030229023 |
| 0.7793922543939544 | 0.5953938015939571 | 0.0010010249117798 |
| 0.8211409506824197 | 0.3767855201745718 | 0.0236666278050777 |
| 0.1788590494032221 | 0.6232145096445265 | 0.9763333871129944 |
| 0.0060421882759130 | 0.5210687180471822 | 0.8629380160053586 |
| 0.9939577865280853 | 0.4789312819281193 | 0.1370619989127135 |
| 0.8013230193195469 | 0.0738937235011718 | 0.0352697544284624 |
| 0.1986769806351205 | 0.9261062914001741 | 0.9647302716558315 |
| 0.0463451347386723 | 0.0552228879565533 | 0.8145743373919530 |
| 0.9536548651824006 | 0.9447770896712484 | 0.1854256775261121 |
| 0.0518708948083173 | 0.1157618534953002 | 0.7323729416294569 |
| 0.9481291051591043 | 0.8842381539882993 | 0.2676270881556420 |
| 0.0307999101439762 | 0.2201280417158884 | 0.7205315890957920 |
| 0.9692000897928850 | 0.7798719881059242 | 0.2794683810935865 |
| 0.0105844401376203 | 0.2580049911036397 | 0.7941735578496463 |
| 0.9894155597986014 | 0.7419949790985640 | 0.2058264570684258 |
| 0.0073779984721725 | 0.1925385410261811 | 0.8742586993864307 |
| 0.9926220015553753 | 0.8074614738783836 | 0.1257413006008008 |
| 0.0261120773818533 | 0.2822028340326099 | 0.6378152678376097 |
| 0.9738879226579442 | 0.7177971361529529 | 0.3621847024155755 |
| 0.0180795135156728 | 0.3290654993814783 | 0.5637782437369481 |
| 0.9819204863885957 | 0.6709344708040916 | 0.4362217265162371 |
| 0.6752047089286108 | 0.1236397355801842 | 0.0440814798809015 |
| 0.3247952910798517 | 0.8763602644736750 | 0.9559185387379827 |
| 0.3225438659039526 | 0.3396918184276956 | 0.0138890820980961 |
| 0.6774561638826455 | 0.6603081815544911 | 0.9861108992575041 |
| 0.6949734748154057 | 0.3226890408821177 | 0.0293215841947330 |
| 0.3050265252201498 | 0.6773109591636555 | 0.9706784214075199 |
| 0.2894314123427009 | 0.1344884118854281 | 0.0364169802395722 |
| 0.7105686175305337 | 0.8655115583195112 | 0.9635829899498134 |
| 0.8563146156835657 | 0.5016582600932509 | 0.8306278534863196 |
| 0.1436853694199201 | 0.4983417399527639 | 0.1693721614317525 |
| 0.8504644194025772 | 0.5213185105737139 | 0.7432575225973537 |
| 0.1495355656878061 | 0.4786814894042948 | 0.2567424475920319 |



|                    |                    |                    |
|--------------------|--------------------|--------------------|
| 0.0058415452318386 | 0.5652872219297578 | 0.6845708817501972 |
| 0.9941584334137517 | 0.4347127780529050 | 0.3154291182370415 |
| 0.1623273850200988 | 0.5843326972823419 | 0.7187821753741162 |
| 0.8376726298512907 | 0.4156673026855771 | 0.2812178544747894 |
| 0.1561135169861601 | 0.5612529185750219 | 0.8071258264407533 |
| 0.8438864829831445 | 0.4387470814857224 | 0.1928741586156519 |
| 0.0015855908331659 | 0.5938211912008953 | 0.5955868624007863 |
| 0.9984144288001744 | 0.4061788087864073 | 0.4044131673843054 |
| 0.0073231977505586 | 0.3731956811477275 | 0.4810466053957612 |
| 0.9926768022465495 | 0.6268043486787320 | 0.5189533945914775 |
| 0.9607455806818592 | 0.8490925270746956 | 0.6192190669543507 |
| 0.0392544192219191 | 0.1509074728885906 | 0.3807809330966947 |
| 0.1330805620487041 | 0.8738764585770085 | 0.6384767921666992 |
| 0.8669194378737686 | 0.1261235414056472 | 0.3615232078205395 |
| 0.1679041420944216 | 0.8500049645712977 | 0.7220974636916182 |
| 0.8320958579635658 | 0.1499950354113651 | 0.2779025362956205 |
| 0.0317702813802327 | 0.8005567663771487 | 0.7903407389261687 |
| 0.9682297186590603 | 0.1994432335861376 | 0.2096592611248767 |
| 0.8626705082036423 | 0.7765769145126171 | 0.7737297667958956 |
| 0.1373294917188232 | 0.2234230854700385 | 0.2262702331913431 |
| 0.8225103511540368 | 0.7999330223958623 | 0.6886749573198827 |
| 0.1774896489039577 | 0.2000669775867934 | 0.3113250426673559 |
| 0.6495286105051932 | 0.7757148716713687 | 0.6700594823679822 |
| 0.3504713894172724 | 0.2242851283112870 | 0.3299405176192565 |
| 0.6134111371182982 | 0.8004332897438360 | 0.5867738907895017 |
| 0.3865888629396963 | 0.1995667102388197 | 0.4132261091977369 |
| 0.7489776952751654 | 0.8497647167296947 | 0.5183141734967975 |
| 0.2510223047826798 | 0.1502352833236813 | 0.4816858264904411 |
| 0.9195217942938072 | 0.8728540716412141 | 0.5341576538673394 |
| 0.0804782056285234 | 0.1271459284121690 | 0.4658423461198993 |
| 0.5541709572643043 | 0.2128371227396499 | 0.6713891141502160 |
| 0.4458290428234903 | 0.7871628921695475 | 0.3286109156348758 |
| 0.6075599577441864 | 0.1403607890784855 | 0.6244814768807103 |
| 0.3924400422198318 | 0.8596392108894406 | 0.3755185529681953 |
| 0.6344897610384095 | 0.0421868470974900 | 0.6663695388527842 |
| 0.3655102390949736 | 0.9578131454642147 | 0.3336304909323147 |
| 0.6102286653712312 | 0.0124635363607339 | 0.7572389840489464 |
| 0.3897713346335223 | 0.9875364897175700 | 0.2427610159382922 |
| 0.5619076879810549 | 0.0815055750228240 | 0.8046804471543823 |
| 0.4380923120001441 | 0.9184944100259287 | 0.1953195379658297 |
| 0.5329369286739052 | 0.1828027518981514 | 0.7634108885813404 |
| 0.4670630713238424 | 0.8171972480798715 | 0.2365890816080380 |
| 0.4826068352700972 | 0.2554387298071461 | 0.8104352950712936 |
| 0.5173931647548073 | 0.7445612403169832 | 0.1895647347775977 |
| 0.4512982633280416 | 0.3529068413110039 | 0.7691213213088020 |
| 0.5487017366690594 | 0.6470931885154485 | 0.2308786786784367 |
| 0.4699377381488787 | 0.3822525988030918 | 0.6782865804193250 |
| 0.5300622619511586 | 0.6177473713871180 | 0.3217134196317204 |
| 0.5215156553781952 | 0.3137911496536177 | 0.6305993470180979 |
| 0.4784843446652616 | 0.6862088205606014 | 0.3694006827670009 |
| 0.0582500001013670 | 0.9745657133263848 | 0.8259729126399193 |
| 0.9417499999006083 | 0.0254342615386989 | 0.1740270724802926 |
| 0.0675714422617304 | 0.0818287929019306 | 0.6782427417794992 |
| 0.9324285576871389 | 0.9181712144915863 | 0.3217572880693922 |
| 0.9958125194266216 | 0.3378265788517609 | 0.7887117478973806 |
| 0.0041874806451219 | 0.6621733913504642 | 0.2112882670206915 |
| 0.9914605485362529 | 0.2195131120691087 | 0.9320781997631116 |
| 0.0085394514635055 | 0.7804868730697407 | 0.0679217852932936 |

|                    |                    |                    |
|--------------------|--------------------|--------------------|
| 0.7384025699257108 | 0.4687784784660209 | 0.8774751790905455 |
| 0.2615974002710431 | 0.5312214917315572 | 0.1225248060296735 |
| 0.7277611473363592 | 0.5030635476072973 | 0.7203261744636151 |
| 0.2722388825363637 | 0.4969364523753583 | 0.2796738255236235 |
| 0.2849413753602192 | 0.6189494139733682 | 0.6764071608344793 |
| 0.7150586246223583 | 0.3810505860846476 | 0.3235928689506196 |
| 0.2730740446975304 | 0.5767774842000932 | 0.8356456737781528 |
| 0.7269259851282257 | 0.4232225157752012 | 0.1643543411399193 |
| 0.2364622006365522 | 0.9137406019614289 | 0.5861240046007978 |
| 0.7635377994214423 | 0.0862593980212409 | 0.4138759953864408 |
| 0.2999009928873519 | 0.8704006126808466 | 0.7359497818776433 |
| 0.7000990071706354 | 0.1295993873018091 | 0.2640502181095954 |
| 0.0606612704927372 | 0.7816905693073650 | 0.8559116351677716 |
| 0.9393387294110411 | 0.2183094306559212 | 0.1440883648832738 |
| 0.7574307425258269 | 0.7390348527494055 | 0.8260124414826251 |
| 0.2425692575320184 | 0.2609651473039705 | 0.1739875585046136 |
| 0.5458704974939224 | 0.7374502755393664 | 0.7230505056608223 |
| 0.4541295024285503 | 0.2625497244432893 | 0.2769494943264164 |
| 0.4796465125204747 | 0.7822317152968665 | 0.5735017667364417 |
| 0.5203534875375126 | 0.2177682846857962 | 0.4264982332507898 |
| 0.7177573307588858 | 0.8682131673376219 | 0.4531140194807790 |
| 0.2822426692991016 | 0.1317868326450338 | 0.5468859805064596 |
| 0.0248958991582739 | 0.9096909749884432 | 0.4816359481235892 |
| 0.9751041007641987 | 0.0903090249942196 | 0.5183640518636494 |
| 0.6280553303266316 | 0.1638126935986790 | 0.5545885026171717 |
| 0.3719446697318531 | 0.8361872766062675 | 0.4454114675722138 |
| 0.6748733915777407 | 0.9872014019674253 | 0.6297736038756057 |
| 0.3251266085215150 | 0.0127985777893471 | 0.3702263961116259 |
| 0.6330351788404158 | 0.9352091866901802 | 0.7896686963985289 |
| 0.3669648211995167 | 0.0647907834246695 | 0.2103312738546563 |
| 0.5450527456591985 | 0.0590510477387483 | 0.8744787220802124 |
| 0.4549472542860613 | 0.9409489410701610 | 0.1255212779070263 |
| 0.4666773168989451 | 0.2322756072992647 | 0.8803106695465601 |
| 0.5333227128969966 | 0.7677243777494880 | 0.1196893155736589 |
| 0.4090146212694847 | 0.4068039364878047 | 0.8066476893699601 |
| 0.5909853787420190 | 0.5931960337097735 | 0.1933522957502589 |
| 0.4425955025297981 | 0.4590359644716173 | 0.6460035184518631 |
| 0.5574044676386691 | 0.5409640057379548 | 0.3539964815353756 |
| 0.5369546426082081 | 0.3363335531123397 | 0.5606883600649510 |
| 0.4630453573286530 | 0.6636664767094729 | 0.4393116101244274 |

**Pd-nitro HSHS a**

1.0000000000000000  
7.3253119623569161      0.1017777906344821      0.8088621704402331  
0.2010518895028840      13.9677657478127735      0.5396022242962714  
3.0433544699094615      1.5228212659673483      15.1338089095489909

|    |    |    |    |    |   |  |
|----|----|----|----|----|---|--|
| Pd | Fe | N  | C  | H  | O |  |
| 2  | 2  | 16 | 60 | 36 | 8 |  |

Direct

|                    |                    |                    |
|--------------------|--------------------|--------------------|
| 0.0088937944887988 | 0.2605597944049407 | 0.4718449025061346 |
| 0.9907016273325553 | 0.7392494314442217 | 0.5283038814598200 |
| 0.4998978281980726 | 0.4999376692687889 | 0.4999041276881115 |
| 0.4998469511796415 | 0.9999229948835691 | 0.4999696738692592 |
| 0.9867238863583765 | 0.1695661060641598 | 0.7965317252834581 |
| 0.0157733799896178 | 0.8305180047713208 | 0.2046182217786239 |
| 0.3932782782473296 | 0.3755812829410203 | 0.0427138040029504 |

|                    |                    |                    |
|--------------------|--------------------|--------------------|
| 0.6064143413491578 | 0.6245553490484994 | 0.9573529666190055 |
| 0.5322588118966394 | 0.6062354428844330 | 0.3807092002319834 |
| 0.4671161564347699 | 0.3937281822530139 | 0.6192067416840032 |
| 0.7249243134796544 | 0.4178003679822169 | 0.4275225242559628 |
| 0.2749544115145923 | 0.5820436573975982 | 0.5723421910572526 |
| 0.4959360781004492 | 0.0168294289019784 | 0.3605248852687382 |
| 0.5041673870192440 | 0.9830561774201740 | 0.6393291260406855 |
| 0.2912399103051726 | 0.1066287594948676 | 0.5250822895826701 |
| 0.7084590114731952 | 0.8931969212722279 | 0.4749573183683395 |
| 0.7130133573793955 | 0.1060601213730266 | 0.4668329045586006 |
| 0.2864953717618377 | 0.8938949503089972 | 0.5331694134307980 |
| 0.3037177326868346 | 0.4208870999996250 | 0.4659711248792462 |
| 0.6961674014898165 | 0.5788229763527397 | 0.5339161605412457 |
| 0.9683796092430228 | 0.2750619651400115 | 0.7847786664523824 |
| 0.0325731960888902 | 0.7249358734271922 | 0.2158146256757618 |
| 0.9884562017054392 | 0.3263916761663026 | 0.8524715675600874 |
| 0.0116866453779636 | 0.6743815490306702 | 0.1477828331558868 |
| 0.9689008913440702 | 0.4265324821969401 | 0.8404730196952030 |
| 0.0296761955689675 | 0.5741470971867599 | 0.1592660244412585 |
| 0.9323743837119878 | 0.4732710328703789 | 0.7618503766330349 |
| 0.0655676401840424 | 0.5265362751428242 | 0.2377376230033477 |
| 0.9160640134848279 | 0.4205562168123720 | 0.6941208114455222 |
| 0.0827891384824824 | 0.5784900062716503 | 0.3057816898809307 |
| 0.9332563607753102 | 0.3205307072294445 | 0.7054978974476498 |
| 0.0670946557261445 | 0.6785943924276339 | 0.2949280798931611 |
| 0.4549818744367116 | 0.3454596605295635 | 0.1236328785086869 |
| 0.5449536458121855 | 0.6546885956455384 | 0.8763713411878840 |
| 0.6417458014671382 | 0.3664377043380753 | 0.1201750538430986 |
| 0.3583319470700701 | 0.6335510461597309 | 0.8796650973608564 |
| 0.6992517155741496 | 0.3373560448112300 | 0.1975096212178968 |
| 0.3011615295653698 | 0.6624691196726715 | 0.8022168003864820 |
| 0.5723074208760082 | 0.2873959913956483 | 0.2759641732652796 |
| 0.4282209200527518 | 0.7125061948560187 | 0.7238399649776142 |
| 0.3874633666183129 | 0.2662398424084955 | 0.2770648400268527 |
| 0.6127993532067109 | 0.7339131384869901 | 0.7229464032612043 |
| 0.3266529201458042 | 0.2954143994677025 | 0.2010105820161385 |
| 0.6733543034642366 | 0.7048190687454152 | 0.7990960751694303 |
| 0.5454844106552841 | 0.5725381026352210 | 0.3018410526387356 |
| 0.4536958345774451 | 0.4274582295636193 | 0.6980848230388403 |
| 0.5464041194709353 | 0.6325715751649170 | 0.2227699404783081 |
| 0.4531005834017279 | 0.3674684503981993 | 0.7771266110208188 |
| 0.5305984492393208 | 0.7331513247905264 | 0.2247046980643148 |
| 0.4694249333353895 | 0.2669063343708373 | 0.7751451474600444 |
| 0.5200976293219171 | 0.7682009778994043 | 0.3070304591388648 |
| 0.4798891481389091 | 0.2318178668123778 | 0.6928478236211717 |
| 0.5223334890618077 | 0.7025297475612149 | 0.3825911246839482 |
| 0.4773519713090835 | 0.2974494664284109 | 0.6173057590982083 |
| 0.5246176256134589 | 0.7936316134311596 | 0.1448669104093909 |
| 0.4758145322263161 | 0.2064896675457888 | 0.8549383359429754 |
| 0.5198171487153402 | 0.8364758690848362 | 0.0709365091393437 |
| 0.4809321088711940 | 0.1637096342746531 | 0.9288356559111861 |
| 0.5159731189860466 | 0.8783792459629183 | 0.9878706626373557 |
| 0.4846953779272880 | 0.1218943984006984 | 0.0119358846703435 |
| 0.8371557944834365 | 0.3593715070849512 | 0.4380097191990373 |
| 0.1626266332653827 | 0.6404894820223461 | 0.5620255803252761 |
| 0.3294494417813425 | 0.0211308044456260 | 0.3405394850765617 |
| 0.6707464247562669 | 0.9789195813471210 | 0.6592222973725512 |
| 0.3194252466621208 | 0.0419405627131297 | 0.2521587392376929 |

|                    |                    |                    |
|--------------------|--------------------|--------------------|
| 0.6809401697863109 | 0.9583302510485439 | 0.7475926095455776 |
| 0.4895702624722631 | 0.0589089753746421 | 0.1793654436680470 |
| 0.5109057809835420 | 0.9413951631334996 | 0.8204764422158064 |
| 0.6634632624918595 | 0.0497416068953171 | 0.2002396908863062 |
| 0.3369527060061728 | 0.9504089533530689 | 0.7996696200865330 |
| 0.6596696670732882 | 0.0295991736183723 | 0.2908432581097458 |
| 0.3405708524842979 | 0.9703157837576697 | 0.7090736015553674 |
| 0.4867155466505437 | 0.0889622730933581 | 0.0892763934729786 |
| 0.5138787870496557 | 0.9114025556084329 | 0.9105575868005289 |
| 0.1804980239017411 | 0.1628989841765147 | 0.5088192585429994 |
| 0.8190908493878126 | 0.8368885825408299 | 0.4912728074288708 |
| 0.8262446600877453 | 0.1618676752518837 | 0.4693883023519021 |
| 0.1732727860530971 | 0.8380262802193670 | 0.5307163477780321 |
| 0.1911010512916675 | 0.3618474911272358 | 0.4697188197673938 |
| 0.8086732521067574 | 0.6378537162921987 | 0.5303376182770378 |
| 0.0179401851120247 | 0.2881689768965501 | 0.9125920610610976 |
| 0.9822536634841796 | 0.4680515225813906 | 0.8926334518702035 |
| 0.9175995875726315 | 0.5513298496255743 | 0.7526134740602828 |
| 0.8910371329131550 | 0.4574410385899554 | 0.6324135825517345 |
| 0.9210574386307968 | 0.2777678932904806 | 0.6540843944101695 |
| 0.8155235160678558 | 0.7216381663855458 | 0.8002067025287118 |
| 0.7099872649608230 | 0.7738079544344956 | 0.6623772283853810 |
| 0.3840311029800887 | 0.7347837107457593 | 0.6633114564774445 |
| 0.1571951641248646 | 0.6458101455018692 | 0.8031228140064641 |
| 0.2633517764834181 | 0.5948321788064064 | 0.9415848902811703 |
| 0.5550567114143803 | 0.4945427089608572 | 0.3036581827732192 |
| 0.5146777945212762 | 0.7267695970286780 | 0.4471306318331685 |
| 0.5094247630858746 | 0.8449070247784931 | 0.3119772554773874 |
| 0.5546641989241792 | 0.6030004395512023 | 0.1606049087849186 |
| 0.2023038510423589 | 0.9413539217617384 | 0.8538867750232271 |
| 0.8184513560043811 | 0.9553035272598791 | 0.7599937599002615 |
| 0.7988361555543051 | 0.9917958762655985 | 0.6013943213836228 |
| 0.2094785815238822 | 0.9768989189694324 | 0.6903498767920908 |
| 0.7366303006211723 | 0.4051594213518541 | 0.0582194167282211 |
| 0.8434540494686829 | 0.3538071793310920 | 0.1964002589216847 |
| 0.6168189929568726 | 0.2649687398953873 | 0.3363754131948014 |
| 0.2903147849023071 | 0.2264329565080914 | 0.3377075615728842 |
| 0.1843219235714599 | 0.2787470317651781 | 0.2000304807109288 |
| 0.1820018621695496 | 0.0451518088650573 | 0.2396757789865518 |
| 0.7981783358408165 | 0.0588432413975468 | 0.1460734044046532 |
| 0.2012698754247708 | 0.0082472970034999 | 0.3983069505487293 |
| 0.7906851966965363 | 0.0228468137114319 | 0.3096290870123894 |
| 0.4907478935601333 | 0.1551086154769123 | 0.6879100483053833 |
| 0.4850414274878929 | 0.2731834611868393 | 0.5527735370789273 |
| 0.4437360643953028 | 0.5054436155852855 | 0.6962685081447546 |
| 0.4446461809671760 | 0.3970503205766889 | 0.8393094405940147 |
| 0.1073882586517882 | 0.5409781580027015 | 0.3673532259083032 |
| 0.0800544858498924 | 0.7207419973659128 | 0.3466325478735683 |
| 0.9826570308899534 | 0.7132875347841363 | 0.0878173316349375 |
| 0.0154269496442367 | 0.5332194987052574 | 0.1068823314581735 |
| 0.0791270005741325 | 0.4484022880934972 | 0.2466092019983890 |
| 0.9641266254351919 | 0.1253192351826016 | 0.7357206282604096 |
| 0.0376439686856074 | 0.8739089228659509 | 0.2660824207120811 |
| 0.0244802527882939 | 0.1292832452997672 | 0.8659369910268921 |
| 0.9799705503076481 | 0.8717753758862870 | 0.1350417032542524 |
| 0.2196061487527459 | 0.3711783974358269 | 0.0505908364141092 |
| 0.7800263060512194 | 0.6289831245220512 | 0.9496141608160471 |
| 0.5181441086798699 | 0.4040257265571512 | 0.9697085918751611 |

0.4814205603041657 0.5960336127252432 0.0302790710596597

**2PdphNO2 HSHS b**

1.0000000000000000  
7.5400198559580573 0.0281204895529837 0.0783910657329836  
0.1539246016071478 13.8794661773208290 -0.2627314870809941  
1.7411000172898343 0.7419255980754977 14.6800429044581691  
Pd Fe N C H O  
2 2 16 60 36 8

Direct

0.0057132035169047 0.2584254629105587 0.4656561276501847  
0.9942867973737037 0.7415745669413951 0.5343438723095701  
0.5000000000373248 0.4999999999955378 0.5000000000134150  
0.4999999999905214 0.999999999990408 0.5000000000134150  
0.5125059057018859 0.5938537602643592 0.3819724332441012  
0.4874940942391817 0.4061462397267164 0.6180275667827289  
0.2888931287071088 0.5850785070101949 0.5623591827607441  
0.7111068414590065 0.4149214929856697 0.4376408171990107  
0.2998779877952771 0.1068881128128041 0.5091017963759228  
0.7001219824975493 0.8931118946365402 0.4908981738035010  
0.6972106961698401 0.1060506492735840 0.4863595597151615  
0.3027893038451239 0.8939493581920885 0.5136404700919996  
0.5023230214533996 0.0059097454520227 0.3538941527391373  
0.4976769786340824 0.9940902336538144 0.6461058472876857  
0.3074765162043249 0.4143477385170655 0.4518757556104660  
0.6925234838294756 0.5856522614984883 0.5481242146360401  
0.0127892997293841 0.8329889882228869 0.2109653464436789  
0.9872107095755212 0.1670110118430657 0.7890346535160830  
0.2751314120980837 0.3706347743443743 0.0690871927716117  
0.7248685879728569 0.6293651958073028 0.9309128295904614  
0.5176048450167485 0.5545000486510432 0.2996834934453645  
0.4823951549233740 0.4454999514101132 0.7003165065814656  
0.5163688665221073 0.6098009689578490 0.2200471923238254  
0.4836311335256767 0.3901990310624939 0.7799527778555984  
0.5086842325876333 0.7110554479054159 0.2253277963235547  
0.4913157673534272 0.2889445520856597 0.7746722037032754  
0.5046251345030939 0.7515893228714319 0.3117442108490991  
0.4953748654379737 0.2484106771196437 0.6882557891777310  
0.5071651234998384 0.6905577043075510 0.3876233094165187  
0.4928348764820711 0.3094422956590606 0.6123767203906354  
0.5046696269500046 0.7691898202011913 0.1456936377238804  
0.4953303730782750 0.2308101797776558 0.8543063771931045  
0.5016350876185953 0.8168976192326269 0.0746028402953840  
0.4983649124528284 0.1831023807751393 0.9253971820666891  
0.1751096583406522 0.6428763704861211 0.5572734927136267  
0.8248903267727385 0.3571236295049545 0.4427265073132034  
0.1869527334889938 0.1617621267020581 0.4937158592061195  
0.8130472367025661 0.8382378434785309 0.5062841706010346  
0.8150646795261451 0.1611834908252163 0.4779873153837499  
0.1849353204546063 0.8388164942670855 0.5220126547956738  
0.1930488983508951 0.3574261854697269 0.4555746059722523  
0.8069511314713651 0.6425737846897377 0.5444253642742467  
0.3474514754444797 0.0118793348949495 0.3171754652327081  
0.6525485244948328 0.9881206483213987 0.6828245645744460  
0.3407387487848439 0.0352386143651202 0.2258515026744092  
0.6592612809777307 0.9647613632689271 0.7741484973524209  
0.5018097480510448 0.0540908510615310 0.1688457404253398

|                    |                    |                    |
|--------------------|--------------------|--------------------|
| 0.4981902519092642 | 0.9459091340593488 | 0.8311542744916522 |
| 0.6638787481720314 | 0.0405464602408259 | 0.2060034343518566 |
| 0.3361212517779890 | 0.9594535360602379 | 0.7939965358946495 |
| 0.6576052002732098 | 0.0173914179587698 | 0.2982155516989948 |
| 0.3423947996457599 | 0.9826085867035061 | 0.7017844781081664 |
| 0.5008431401533073 | 0.0921957034086489 | 0.0795507070213262 |
| 0.4991568598456411 | 0.9078043189105287 | 0.9204492855604229 |
| 0.5000743792227880 | 0.1339984897927522 | 0.0052634236322149 |
| 0.4999256505632488 | 0.8660014952809405 | 0.9947365968518227 |
| 0.0208718073491596 | 0.7272832011686461 | 0.2195258256942694 |
| 0.9791281908089786 | 0.2727167988101868 | 0.7804741892227227 |
| 0.9983423143673846 | 0.6728923055882348 | 0.1442014357620920 |
| 0.0016576558450936 | 0.3271076944198654 | 0.8557985493074938 |
| 0.0037187952424702 | 0.5726067930346161 | 0.1540554200975990 |
| 0.9962812010186184 | 0.4273932069734911 | 0.8459445649719868 |
| 0.0315605368549043 | 0.5288074596844154 | 0.2376874154558450 |
| 0.9684394389680477 | 0.4711925403236847 | 0.7623125696137549 |
| 0.0542197862260778 | 0.5847234331222211 | 0.3122950495100980 |
| 0.9457802175480339 | 0.4152765668933327 | 0.6877049207364010 |
| 0.0489628367479327 | 0.6848511002892650 | 0.3034692696701882 |
| 0.9510371558600710 | 0.3151488997066068 | 0.6965307302895738 |
| 0.3904516364084429 | 0.3390144201352001 | 0.1371762701833745 |
| 0.6095483636184227 | 0.6609855500576316 | 0.8628237447336176 |
| 0.3139159156018394 | 0.2904136333185789 | 0.2164416280276029 |
| 0.6860840845191802 | 0.7095863666847322 | 0.7835583571090510 |
| 0.4246782095338801 | 0.2593911853396165 | 0.2801378370113312 |
| 0.5753217904480437 | 0.7406088146269809 | 0.7198621927958229 |
| 0.6085451704787914 | 0.2758081819729696 | 0.2639363400049533 |
| 0.3914548294762596 | 0.7241918180228950 | 0.7360636599548087 |
| 0.6832656337427636 | 0.3240034195056083 | 0.1838447181393477 |
| 0.3167343662432387 | 0.6759965507117016 | 0.8161552669973133 |
| 0.5741890606630093 | 0.3567812771804100 | 0.1196756910816319 |
| 0.4258109393398257 | 0.6432187526136985 | 0.8803242939879610 |
| 0.5232061565020416 | 0.4762177194838983 | 0.2992239715324416 |
| 0.4767938434798822 | 0.5237822804827061 | 0.7007760582747267 |
| 0.5213747337659740 | 0.5760336771898480 | 0.1546175137282475 |
| 0.4786252662623198 | 0.4239663227889849 | 0.8453825011887304 |
| 0.4993922165902092 | 0.8290122676987721 | 0.3194021783873850 |
| 0.5006077834984310 | 0.1709877322970854 | 0.6805978215723698 |
| 0.5044505221625641 | 0.7189563613882086 | 0.4552534063137514 |
| 0.4955494778184146 | 0.2810436386484767 | 0.5447466234934026 |
| 0.2261636353918632 | 0.9987787909692827 | 0.3637158008753900 |
| 0.7738363943181454 | 0.0012212015976019 | 0.6362841990843648 |
| 0.2130088458143859 | 0.0405155803676536 | 0.1994598380467991 |
| 0.7869911690472691 | 0.9594843972834255 | 0.8005401470228009 |
| 0.7912970372531092 | 0.0501170253011622 | 0.1635738137414720 |
| 0.2087029627458179 | 0.9498829783635898 | 0.8364261564379589 |
| 0.7792842108628477 | 0.0084712936638383 | 0.3299061595694752 |
| 0.2207157890580120 | 0.9915286779429309 | 0.6700938404573549 |
| 0.9755945130768637 | 0.7083375269749368 | 0.0801435320668631 |
| 0.0244054739530455 | 0.2916624730283743 | 0.9198564530698121 |
| 0.9841484332779231 | 0.5290430187265542 | 0.0964601368652254 |
| 0.0158515592697341 | 0.4709569812522929 | 0.9035398780517667 |
| 0.0345079409653550 | 0.4505984953609143 | 0.2452880832359057 |
| 0.9654920776898521 | 0.5494014748489491 | 0.7547119167238492 |
| 0.0754370240733451 | 0.5504425659014487 | 0.3771827004464186 |
| 0.9245629870618046 | 0.4495574341188942 | 0.6228172697330123 |
| 0.0654363372051066 | 0.7300661856995703 | 0.3603688280022297 |

|                    |                    |                    |
|--------------------|--------------------|--------------------|
| 0.9345636385574920 | 0.2699338142915124 | 0.6396311720245933 |
| 0.1709039989780194 | 0.2776322513324416 | 0.2271455160392506 |
| 0.8290960011106208 | 0.7223677486634301 | 0.7728544839205043 |
| 0.3678631116285871 | 0.2221359420902189 | 0.3424790666265309 |
| 0.6321368884474836 | 0.7778640876868650 | 0.6575209334002992 |
| 0.6931524324196801 | 0.2512531914401919 | 0.3143790636196471 |
| 0.3068475675339499 | 0.7487467787696787 | 0.6856209363401078 |
| 0.8266900770491361 | 0.3356227827757934 | 0.1711353036768202 |
| 0.1733099229476309 | 0.6643771874629891 | 0.8288647037280086 |
| 0.6279506650785436 | 0.3945381327093003 | 0.0569863109680355 |
| 0.3720493349978113 | 0.6054618673279109 | 0.9430136629003911 |
| 0.0270432817542385 | 0.8797561366198252 | 0.2804672923682716 |
| 0.9729567033182960 | 0.1202438633957286 | 0.7195326778782274 |
| 0.9914979316487091 | 0.8710708025070133 | 0.1355307982998397 |
| 0.0085020775967806 | 0.1289291974718125 | 0.8644692166171524 |
| 0.1172664180393994 | 0.3417146493222987 | 0.0784014926129828 |
| 0.8827335819425173 | 0.6582853506442916 | 0.9215985371941713 |
| 0.3396616236600494 | 0.4249106722174645 | 0.0047423211768916 |
| 0.6603383764241002 | 0.5750893277523161 | 0.9952576909230473 |

2PdphNO2 HSLs a

|                    |                     |                     |
|--------------------|---------------------|---------------------|
| 1.0000000000000000 |                     |                     |
| 7.3516474003652972 | 0.0076300685680361  | 0.2437776815640221  |
| 0.0431436466094478 | 13.7412919344784523 | -0.0527923196256201 |
| 1.3446399116387624 | 2.4494563944733936  | 15.2010183886916899 |

|    |    |    |    |    |   |  |
|----|----|----|----|----|---|--|
| Pd | Fe | N  | C  | H  | O |  |
| 2  | 2  | 16 | 60 | 36 | 8 |  |

Direct

|                    |                    |                    |
|--------------------|--------------------|--------------------|
| 0.0056778637732293 | 0.2533933902962175 | 0.4700261979195588 |
| 0.9943221584005428 | 0.7466065798932888 | 0.5299738318931730 |
| 0.4999999999714859 | 0.5000000000241727 | 0.5000000000065796 |
| 0.4999999999576374 | 0.0000000000314202 | 0.5000000000065796 |
| 0.5206966646494706 | 0.6076750096964716 | 0.3817917379768545 |
| 0.4793033354433121 | 0.3923249903443136 | 0.6182082322367251 |
| 0.3093286676801270 | 0.4164398674614560 | 0.4535233455242533 |
| 0.6906713621043750 | 0.5835601325219599 | 0.5464766842884785 |
| 0.3143170234381643 | 0.0957678027283606 | 0.5009664796782332 |
| 0.6856829467373018 | 0.9042321749277562 | 0.4990335501344916 |
| 0.6832242029914752 | 0.0986787202621215 | 0.4863309664721243 |
| 0.3167757969634053 | 0.9013212797061811 | 0.5136690037414553 |
| 0.5036596640003381 | 0.0145206227758479 | 0.3712340949196502 |
| 0.4963403360322332 | 0.9854793911832616 | 0.6287658752939222 |
| 0.2879773564941672 | 0.5823115067252047 | 0.5545119141746397 |
| 0.7120226137345185 | 0.4176884932506439 | 0.4454880858385124 |
| 0.0082308962766433 | 0.8449918082914536 | 0.2176017803672892 |
| 0.9917691270309916 | 0.1550081917688715 | 0.7823982195800880 |
| 0.4113149916610368 | 0.3749231441617979 | 0.0345692166598468 |
| 0.5886849785320223 | 0.6250768558370652 | 0.9654307907867548 |
| 0.5300748264168078 | 0.5723805104286370 | 0.3048310866546515 |
| 0.4699251735264767 | 0.4276194895472045 | 0.6951689133585077 |
| 0.5314209006366113 | 0.6327570305369292 | 0.2241599319181091 |
| 0.4685790993660319 | 0.3672429694729615 | 0.7758400830277310 |
| 0.5214019337216058 | 0.7355637558719508 | 0.2224129020882231 |
| 0.4785980663787868 | 0.2644362441808212 | 0.7775870680595744 |
| 0.5144102373927097 | 0.7721254095374022 | 0.3030514839288614 |
| 0.4855897627000658 | 0.2278745905033759 | 0.6969484862847253 |

|                    |                    |                    |
|--------------------|--------------------|--------------------|
| 0.5144834938651357 | 0.7058974513715341 | 0.3806214283131126 |
| 0.4855165060857516 | 0.2941025486163085 | 0.6193785716342717 |
| 0.5159629625743349 | 0.7972947791288476 | 0.1407870916457057 |
| 0.4840370373802259 | 0.2027052209119304 | 0.8592128785678810 |
| 0.5084422109199664 | 0.8416948108259916 | 0.0660130429957846 |
| 0.4915577890586391 | 0.1583051891993392 | 0.9339869495839253 |
| 0.1962428627884023 | 0.3550772873499852 | 0.4592945831566269 |
| 0.8037571223457718 | 0.6449226828395211 | 0.5407054466561050 |
| 0.8068310616201515 | 0.1539297138753710 | 0.4802308414990435 |
| 0.1931689382664530 | 0.8460703009731887 | 0.5197691584483266 |
| 0.1943915999418948 | 0.1516468682320351 | 0.4928830222948903 |
| 0.8056084297896220 | 0.8483531466770060 | 0.5071169777182689 |
| 0.1764411955791800 | 0.6436068612267931 | 0.5500008272273007 |
| 0.8235588192905041 | 0.3563931387490626 | 0.4499991727858585 |
| 0.6634230944934387 | 0.0280804326513788 | 0.3170523873304489 |
| 0.3365769054405305 | 0.9719195375305603 | 0.6829476126827032 |
| 0.6703239000274337 | 0.0466284375672643 | 0.2259673949883449 |
| 0.3296760999752095 | 0.9533715624426193 | 0.7740326199574952 |
| 0.5056329126293875 | 0.0524133974519501 | 0.1872994212328791 |
| 0.4943670873272339 | 0.9475865839201205 | 0.8127005639133884 |
| 0.3406874837582450 | 0.0327269951202069 | 0.2440863737194476 |
| 0.6593125161394227 | 0.9672730309260444 | 0.7559136411606104 |
| 0.3453915387380064 | 0.0146475015870990 | 0.3344220078709839 |
| 0.6546084612462764 | 0.9853525235356670 | 0.6655779623425957 |
| 0.5042174487023985 | 0.0819423978483513 | 0.0960528354846630 |
| 0.4957825512935798 | 0.9180575872743617 | 0.9039471943280688 |
| 0.4988032073797370 | 0.1153283133557039 | 0.0179538389076654 |
| 0.5011967925031371 | 0.8846716642549382 | 0.9820461517643437 |
| 0.0244372582740908 | 0.7376504891875797 | 0.2236380533343549 |
| 0.9755627398128510 | 0.2623495108267306 | 0.7763619317461234 |
| 0.0312962376928994 | 0.6951450984435041 | 0.1468845028688506 |
| 0.9687037808487347 | 0.3048549015708133 | 0.8531154822116278 |
| 0.0501356991208439 | 0.5932335747163435 | 0.1539399553114151 |
| 0.9498643083453118 | 0.4067664252210506 | 0.8460600596344321 |
| 0.0616204485336809 | 0.5362268437027637 | 0.2363415868767547 |
| 0.9383795384777756 | 0.4637731562346232 | 0.7636584280690784 |
| 0.0527181977920534 | 0.5802771969953469 | 0.3125647407984431 |
| 0.9472818003429495 | 0.4197228029880691 | 0.6874352890142887 |
| 0.0341046649625554 | 0.6818260934075155 | 0.3065058409115835 |
| 0.9658953396910732 | 0.3181739066332696 | 0.6934941293020103 |
| 0.4481709188480352 | 0.3443924352928533 | 0.1259513821070826 |
| 0.5518290810596227 | 0.6556075647060169 | 0.8740486253395190 |
| 0.3106135628842495 | 0.2947967260415894 | 0.1867084079583492 |
| 0.6893864073517264 | 0.7052032740187428 | 0.8132915919890209 |
| 0.3477968754184459 | 0.2649760776017942 | 0.2730224256122753 |
| 0.6522031543567266 | 0.7350238925877193 | 0.7269776042004565 |
| 0.5188821763933049 | 0.2848399379067459 | 0.2977794241139833 |
| 0.4811178236881943 | 0.7151600620691028 | 0.7022205758991618 |
| 0.6543061310635636 | 0.3354162407592085 | 0.2359693995575611 |
| 0.3456938688966531 | 0.6645837890225437 | 0.7640306003898161 |
| 0.6202043498154666 | 0.3653186580324217 | 0.1490023455574985 |
| 0.3797956501973587 | 0.6346813121154895 | 0.8509976395229799 |
| 0.5356779527108770 | 0.4927099782201978 | 0.3095869581582917 |
| 0.4643220472320877 | 0.5072900218281475 | 0.6904130418548675 |
| 0.5370557599307872 | 0.6020182649579269 | 0.1632863275322265 |
| 0.4629442400794517 | 0.3979817350639436 | 0.8367136873478316 |
| 0.5079294451368810 | 0.8505875803742455 | 0.3048358938684927 |
| 0.4920705549406179 | 0.1494124196211573 | 0.6951641358784570 |



|                    |                    |                    |
|--------------------|--------------------|--------------------|
| 0.5086005656617516 | 0.7312953696433482 | 0.4440134721183213 |
| 0.4913994342812202 | 0.2687046304050043 | 0.5559865278948308 |
| 0.7870044788495605 | 0.0237756235806970 | 0.3490181860177728 |
| 0.2129955212186161 | 0.9762243466207963 | 0.6509818437291770 |
| 0.8014695208772906 | 0.0565425937245507 | 0.1850281611496598 |
| 0.1985304791076317 | 0.9434574285786184 | 0.8149718388634994 |
| 0.2104879081146009 | 0.0321603607235303 | 0.2178211331285027 |
| 0.7895120620288836 | 0.9678396243266860 | 0.7821788966842291 |
| 0.2210197529525288 | 0.0003287950069293 | 0.3798015012271776 |
| 0.7789802321534012 | 0.9996711870560162 | 0.6201984689863949 |
| 0.0221858254925138 | 0.7413624290806524 | 0.0838717301682905 |
| 0.9778141706835441 | 0.2586375709182107 | 0.9161282772783181 |
| 0.0571390023305014 | 0.5586676336433314 | 0.0949113179835450 |
| 0.9428609752472212 | 0.4413323663170772 | 0.9050887043957374 |
| 0.0793476820151113 | 0.4568976289369928 | 0.2414065880354528 |
| 0.9206523104739901 | 0.5431024009052692 | 0.7585934119776923 |
| 0.0613887583419128 | 0.5357548155063370 | 0.3763894835615673 |
| 0.9386112527845896 | 0.4642451844770790 | 0.6236105462511645 |
| 0.0275469458550361 | 0.7179410146340786 | 0.3646320343382641 |
| 0.9724530634979516 | 0.2820589853342099 | 0.6353679358753226 |
| 0.1796717739183293 | 0.2791598146060821 | 0.1654379808520474 |
| 0.8203282409719748 | 0.7208402152286126 | 0.8345619893615250 |
| 0.2429613022871635 | 0.2264612423444348 | 0.3216896006870371 |
| 0.7570387125706191 | 0.7735387577114778 | 0.6783104291257089 |
| 0.5459437675870049 | 0.2617480471191485 | 0.3654405916016970 |
| 0.4540562324828983 | 0.7382519528642675 | 0.6345594382110349 |
| 0.7855822354547186 | 0.3527905338584816 | 0.2561535377040798 |
| 0.2144177645077718 | 0.6472094661217938 | 0.7438464324437177 |
| 0.7221399459185704 | 0.4051163082644109 | 0.0996622424772582 |
| 0.2778600541388982 | 0.5948836917268920 | 0.9003377351697708 |
| 0.9999177676328230 | 0.8807741277292109 | 0.2876341412909014 |
| 0.0000822612071048 | 0.1192258723115671 | 0.7123658289226782 |
| 0.0045610278560630 | 0.8956552579219519 | 0.1434307829759831 |
| 0.9954389674667254 | 0.1043447420923584 | 0.8565692021044953 |
| 0.5448593226423029 | 0.4000400186810751 | 0.9777473140579431 |
| 0.4551406773865025 | 0.5999600110618246 | 0.0222526841132975 |
| 0.2491460881088088 | 0.3740378663403732 | 0.0181792202763589 |
| 0.7508539415941939 | 0.6259621038740590 | 0.9818208018397954 |

**2PdphNO2 HSLs b**

|                     |    |                     |    |                     |   |  |
|---------------------|----|---------------------|----|---------------------|---|--|
| 1.0000000000000000  |    |                     |    |                     |   |  |
| 7.4165215046081467  |    | -0.0753049456454509 |    | -0.3091731329447716 |   |  |
| -0.1009393655189667 |    | 13.5728003276763491 |    | -0.3826062478752445 |   |  |
| 0.2501548746855495  |    | 2.0507863603438574  |    | 15.0419812344439503 |   |  |
| Pd                  | Fe | N                   | C  | H                   | O |  |
| 2                   | 2  | 16                  | 60 | 36                  | 8 |  |

Direct

|                    |                    |                    |
|--------------------|--------------------|--------------------|
| 0.0057555236055862 | 0.2526688583115089 | 0.4719236575857835 |
| 0.9942444985681860 | 0.7473311118779975 | 0.5280763722269484 |
| 0.499999999714859  | 0.500000000241727  | 0.500000000065796  |
| 0.499999999576374  | 0.000000000314202  | 0.500000000065796  |
| 0.5224011594374858 | 0.6003893721991389 | 0.3808958268969178 |
| 0.4775988406552898 | 0.3996106278416391 | 0.6191041433166617 |
| 0.3166586840616219 | 0.4095083647839175 | 0.4376387071767383 |
| 0.6833413457228730 | 0.5904916351994984 | 0.5623613226359936 |
| 0.3177298542130274 | 0.0962871825696823 | 0.4944102676554465 |

|                    |                    |                    |
|--------------------|--------------------|--------------------|
| 0.6822701159624387 | 0.9037127950864345 | 0.5055897621572782 |
| 0.6826888748106725 | 0.0988703469336585 | 0.4967130762606828 |
| 0.3173111251442080 | 0.9011296530346300 | 0.5032868939528967 |
| 0.4957340571583160 | 0.0108230893606418 | 0.3700341802684335 |
| 0.5042659428742553 | 0.9891769245984676 | 0.6299657899451532 |
| 0.2861765401518994 | 0.5822992465809591 | 0.5373774499880639 |
| 0.7138234300767934 | 0.4177007533948967 | 0.4626225500250882 |
| 0.9953688415050053 | 0.8486038844743007 | 0.2147210281846839 |
| 0.0046311818026297 | 0.1513961155860315 | 0.7852789717626862 |
| 0.2795310471638217 | 0.3710321745299723 | 0.0678357470974191 |
| 0.7204689527269110 | 0.6289677956629873 | 0.9321642604149716 |
| 0.5513064214892864 | 0.5622450422937817 | 0.3041838509051615 |
| 0.4486935784540051 | 0.4377549576820741 | 0.6958161491079906 |
| 0.5540824927406334 | 0.6199475637899425 | 0.2230987853879896 |
| 0.4459175072620098 | 0.3800524362199411 | 0.7769012295578506 |
| 0.5243611111220901 | 0.7225782802291079 | 0.2205441782100479 |
| 0.4756388889782954 | 0.2774217198236641 | 0.7794557919377425 |
| 0.4962876647849512 | 0.7619900545251568 | 0.3012284836482166 |
| 0.5037123353078385 | 0.2380099455156284 | 0.6987714865653700 |
| 0.4970548075475065 | 0.6986532875557927 | 0.3792303993137267 |
| 0.5029451924033808 | 0.3013467124320499 | 0.6207696006336505 |
| 0.5219967891715385 | 0.7827397115257497 | 0.1388625875275480 |
| 0.4780032107830365 | 0.2172602885150283 | 0.8611373826860245 |
| 0.5194709864224620 | 0.8304474216628677 | 0.0654375577658541 |
| 0.4805290135561435 | 0.1695525783624703 | 0.9345624348138557 |
| 0.1984951642609758 | 0.3513793296017909 | 0.4490641894324128 |
| 0.8015048208731983 | 0.6486206405877084 | 0.5509358403803191 |
| 0.8064844666072233 | 0.1537460629631227 | 0.4910952408043059 |
| 0.1935155332793883 | 0.8462539518854157 | 0.5089047591430642 |
| 0.1958897473259782 | 0.1506991406517031 | 0.4866614243725991 |
| 0.8041102824055315 | 0.8493008742573451 | 0.5133385756405460 |
| 0.1754253029669002 | 0.6428717614059281 | 0.5375680628599113 |
| 0.8245747119027982 | 0.3571282385699277 | 0.4624319371532479 |
| 0.6508548073024230 | 0.0173264155728674 | 0.3246129180505122 |
| 0.3491451926315321 | 0.9826735546090717 | 0.6753870819626400 |
| 0.6533495042728532 | 0.0362536563478457 | 0.2331687342990350 |
| 0.3466504957297900 | 0.9637463436620308 | 0.7668312806468052 |
| 0.4891962650770765 | 0.0503311708767527 | 0.1850236334133228 |
| 0.5108037348795378 | 0.9496688104953250 | 0.8149763517329305 |
| 0.3281014196598235 | 0.0365125994015756 | 0.2322982336882902 |
| 0.6718985802378441 | 0.9634874266446616 | 0.7677017811917679 |
| 0.3370974910788505 | 0.0171575600020475 | 0.3237159932836704 |
| 0.6629025089054323 | 0.9828424651207186 | 0.6762839769299092 |
| 0.4860600749988180 | 0.0836008438176847 | 0.0940455241919125 |
| 0.5139399249971603 | 0.9163991413050283 | 0.9059545056208123 |
| 0.4831782425545441 | 0.1220057953973139 | 0.0170730617237425 |
| 0.5168217573283300 | 0.8779941822133281 | 0.9829269289482667 |
| 0.0153432549669361 | 0.7408430313722505 | 0.2191184274270555 |
| 0.9846567431199986 | 0.2591569686420598 | 0.7808815576534229 |
| 0.0221094280768170 | 0.6963519538741707 | 0.1404830907572716 |
| 0.9778905904648170 | 0.3036480461401396 | 0.8595168943232068 |
| 0.0439525247915569 | 0.5939961218080470 | 0.1462661564551695 |
| 0.9560474826745988 | 0.4060038781293542 | 0.8537338584906706 |
| 0.0593814217478013 | 0.5386062495800132 | 0.2292850852239425 |
| 0.9406185652636552 | 0.4613937503573737 | 0.7707149297218905 |
| 0.0513271873872654 | 0.5846324984559743 | 0.3073012977142682 |
| 0.9486728107477376 | 0.4153675015274416 | 0.6926987320984637 |
| 0.0289663983825506 | 0.6866124506433948 | 0.3025204896101741 |

|                    |                    |                    |
|--------------------|--------------------|--------------------|
| 0.9710336062710780 | 0.3133875493973903 | 0.6974794806034126 |
| 0.4094596163780508 | 0.3398736252968320 | 0.1394604932761041 |
| 0.5905403837034484 | 0.6601263746790238 | 0.8605395067370480 |
| 0.3456514699965325 | 0.2966189594995683 | 0.2205834680789280 |
| 0.6543485299467591 | 0.7033810404762875 | 0.7794165319342383 |
| 0.5937318577353068 | 0.3536066842786809 | 0.1236741159432810 |
| 0.4062681422508945 | 0.6463933157586226 | 0.8763258765706468 |
| 0.4700834988835609 | 0.2664940346226103 | 0.2879071373566333 |
| 0.5299165010597306 | 0.7335059653532383 | 0.7120928626565188 |
| 0.6545854641899211 | 0.2786259728705147 | 0.2731640094653613 |
| 0.3454145358037053 | 0.7213739972729698 | 0.7268360054804646 |
| 0.7163939877631691 | 0.3219932388760114 | 0.1915143158327268 |
| 0.2836060122470627 | 0.6780067611458662 | 0.8084856990473170 |
| 0.5722377187869938 | 0.4827293750053627 | 0.3093892238958276 |
| 0.4277622811559780 | 0.5172706250429826 | 0.6906107761173388 |
| 0.5791917445727464 | 0.5870406058840842 | 0.1625159059109436 |
| 0.4208082554374926 | 0.4129593941377934 | 0.8374841089691216 |
| 0.4734760703713263 | 0.8404786593116711 | 0.3025034042449875 |
| 0.5265239297061797 | 0.1595213406837317 | 0.6974966255019552 |
| 0.4759132470466412 | 0.7263629537318366 | 0.4425955816217026 |
| 0.5240867528963378 | 0.2736370463165159 | 0.5574044183914424 |
| 0.7742935611339945 | 0.0078024487237158 | 0.3639443765505845 |
| 0.2257064389341821 | 0.9921975214777774 | 0.6360556531963653 |
| 0.7807424942160779 | 0.0413021832576703 | 0.1994749817966905 |
| 0.2192575057688515 | 0.9586978390454988 | 0.8005250182164687 |
| 0.1981423119018757 | 0.0419316425399430 | 0.1978563627527308 |
| 0.8018576582416088 | 0.9580683425102805 | 0.8021436670600011 |
| 0.2163363936674543 | 0.0073514684644493 | 0.3622923875898891 |
| 0.7836635914384757 | 0.9926485135985033 | 0.6377075826236904 |
| 0.0096662557873657 | 0.7410869467004559 | 0.0769530009240356 |
| 0.9903337403886923 | 0.2589130532984072 | 0.9230470065225731 |
| 0.0466300915030615 | 0.5578220394409144 | 0.0858050202746341 |
| 0.9533698860746611 | 0.4421779605194942 | 0.9141950021046412 |
| 0.0780658773621781 | 0.4589191509012167 | 0.2333802207589244 |
| 0.9219341151269234 | 0.5410808789410453 | 0.7666197792542349 |
| 0.0644308505017293 | 0.5414479966883619 | 0.3715777682982946 |
| 0.9355691606247731 | 0.4585520032950683 | 0.6284222615144373 |
| 0.0226651424437208 | 0.7243291859584957 | 0.3620493871267740 |
| 0.9773348669092670 | 0.2756708140097928 | 0.6379505830868055 |
| 0.2016173703420563 | 0.2868070061668035 | 0.2297136858519622 |
| 0.7983825998826362 | 0.7131929938285921 | 0.7702863438949876 |
| 0.6369815937055421 | 0.3879336599972021 | 0.0597351559022741 |
| 0.3630184063072832 | 0.6120663101507091 | 0.9402648291782114 |
| 0.4236803810845018 | 0.2332227280743169 | 0.3516619958105949 |
| 0.5763196190176103 | 0.7667773017603778 | 0.6483379744029847 |
| 0.7504232329425733 | 0.2543304817921666 | 0.3260954324817433 |
| 0.2495767671296036 | 0.7456694883897725 | 0.6739045675314017 |
| 0.8601925506652677 | 0.3307339344465134 | 0.1803721619240122 |
| 0.1398074494261081 | 0.6692660357398523 | 0.8196278082237924 |
| 0.9859739774042708 | 0.8860774279560530 | 0.2862151768444292 |
| 0.0140260514356569 | 0.1139225720847321 | 0.7137847933691503 |
| 0.9900010923028759 | 0.8981309545004166 | 0.1404928777248671 |
| 0.0099989030199126 | 0.1018690455139009 | 0.8595071073556184 |
| 0.1156313608669564 | 0.3532682562246379 | 0.0805328256947462 |
| 0.8843686540714089 | 0.6467317735791625 | 0.9194671892510868 |
| 0.3382505205325614 | 0.4140378128352680 | 0.9974203366218291 |
| 0.6617494646126687 | 0.5859621871022966 | 0.0025796373413627 |

2PdphNO2 LSLS a

1.0000000000000000  
7.3013409068738406 -0.0018693634246174 0.0336864397697143  
0.0276762965033593 13.4805362637786477 0.0622619759683044  
0.9195598722821835 2.5247141083387779 15.2027234487871894

Pd Fe N C H O  
2 2 16 60 36 8

Direct

0.0037324457325170 0.2608279007766399 0.4646938619039176  
0.9962675764412552 0.7391720694128665 0.5353061679088071  
0.4999999999714859 0.5000000000241727 0.5000000000065796  
0.4999999999576374 0.0000000000314202 0.5000000000065796  
0.5097981685954380 0.5927271755946109 0.3871214716253704  
0.4902018314973446 0.4072728244461743 0.6128784985882021  
0.3189051846575950 0.4185715484463230 0.4644012177955830  
0.6810948451269070 0.5814284515370929 0.5355988120171489  
0.3139430146664992 0.0982975488650482 0.4942817151456609  
0.6860569555089668 0.9017024287910615 0.5057183146670710  
0.6832605247155072 0.1011064821451839 0.4864034316933399  
0.3167394752393875 0.8988935178231188 0.5135965385202397  
0.5016015766332345 0.0112440496359696 0.3712041241697648  
0.4983984233993368 0.9887559643231398 0.6287958460438077  
0.3096256913445359 0.5799678162553832 0.5391052952147959  
0.6903742788841569 0.4200321837204726 0.4608947047983563  
0.0022501868071245 0.8454557769774027 0.2154253990494794  
0.9977498365005033 0.1545442230829224 0.7845746008978907  
0.4217665890826652 0.3745519380147115 0.0337898387405389  
0.5782333811103939 0.6254480619841587 0.9662101687060627  
0.5156183355457600 0.5562092716478872 0.3106329079674737  
0.4843816643975316 0.4437907283279614 0.6893670920456856  
0.5197821921835342 0.6177059503723754 0.2290933610987338  
0.4802178078191091 0.3822940496375153 0.7709066538471063  
0.5166007258850129 0.7230859685119597 0.2246016401608699  
0.4833992742153796 0.2769140315408123 0.7753983299869276  
0.5124146053790639 0.7605839394165486 0.3045782601472311  
0.4875853947137117 0.2394160606242366 0.6954217100663556  
0.5092753364471108 0.6938777308865625 0.3834318631849598  
0.4907246635037765 0.3061222691012802 0.6165681367624245  
0.5152074926723387 0.7866515525401283 0.1421620571833984  
0.4847925072822292 0.2133484475006568 0.8578379130301812  
0.5111610887834246 0.8349069784110483 0.0673745849891603  
0.4888389111951810 0.1650930216142896 0.9326254075905496  
0.1991084033144972 0.3628275909721310 0.4586205935420580  
0.8008915818196769 0.6371723792173754 0.5413794362706739  
0.8059054036822246 0.1587237908892405 0.4774905505844131  
0.1940945962043870 0.8412762239593121 0.5225094493629499  
0.1941848823907577 0.1563264963079192 0.4843960294891119  
0.8058151473407591 0.8436735186011362 0.5156039705240403  
0.1875264624704158 0.6352930655424700 0.5458131462297189  
0.8124735523992754 0.3647069344333858 0.4541868537834404  
0.6608968036508642 0.0252010340045530 0.3205478875576162  
0.3391031962831050 0.9747989361773861 0.6794521124555359  
0.6662218941122120 0.0445154506310033 0.2293638315676958  
0.3337781058904312 0.9554845493788804 0.7706361833781443  
0.5005085247114991 0.0504344778091692 0.1867303862887795  
0.4994914752451223 0.9495655035629014 0.8132695988574810

|                    |                    |                    |
|--------------------|--------------------|--------------------|
| 0.3362802536005418 | 0.0291715717567413 | 0.2399056914992670 |
| 0.6637197462971329 | 0.9708284542895029 | 0.7600943233807911 |
| 0.3425296902598660 | 0.0104906509278067 | 0.3306590588589700 |
| 0.6574703097244168 | 0.9895093741949594 | 0.6693409113546096 |
| 0.4978751223504219 | 0.0821208201778063 | 0.0951576094998927 |
| 0.5021248776455565 | 0.9178791649448996 | 0.9048424203128462 |
| 0.4936646327279348 | 0.1186035466508031 | 0.0168315327157558 |
| 0.5063353671549393 | 0.8813964309598390 | 0.9831684579562534 |
| 0.0155718243538345 | 0.7357611652145977 | 0.2230484723359893 |
| 0.9844281737330931 | 0.2642388347997127 | 0.7769515127444890 |
| 0.0287068092838538 | 0.6927248030639106 | 0.1466872626981015 |
| 0.9712932092577802 | 0.3072751969503997 | 0.8533127223823769 |
| 0.0449714170492825 | 0.5884254570748837 | 0.1555287743981708 |
| 0.9550285904168803 | 0.4115745428625033 | 0.8444712405476693 |
| 0.0475091134618424 | 0.5297315403557548 | 0.2393141586936878 |
| 0.9524908735496140 | 0.4702684595816393 | 0.7606858562521452 |
| 0.0323401286456217 | 0.5744219902085561 | 0.3149977491768468 |
| 0.9676598694893812 | 0.4255780097748598 | 0.6850022806358851 |
| 0.0164822968042344 | 0.6783054570129394 | 0.3072248785053873 |
| 0.9835177078493942 | 0.3216945430278457 | 0.6927750917081994 |
| 0.4531227564272555 | 0.3418609191095641 | 0.1272376844459018 |
| 0.5468772434804094 | 0.6581390808892991 | 0.8727623230007069 |
| 0.3097628476812773 | 0.2945861337416460 | 0.1831460005222070 |
| 0.6902371225546986 | 0.7054138663186933 | 0.8168539994251702 |
| 0.3409133887045002 | 0.2628172366561401 | 0.2715344959398323 |
| 0.6590866410706653 | 0.7371827335333663 | 0.7284655338728996 |
| 0.5122302269449719 | 0.2781684647193430 | 0.3028483401483513 |
| 0.4877697731365274 | 0.7218315352565128 | 0.6971516598648080 |
| 0.6538024762573116 | 0.3262566003476053 | 0.2457332268981034 |
| 0.3461975237028980 | 0.6737434294341398 | 0.7542667730492738 |
| 0.6253912781316444 | 0.3585212271286693 | 0.1569227593933320 |
| 0.3746087218811809 | 0.6414787430192419 | 0.8430772256871464 |
| 0.5158584509312192 | 0.4749329306546812 | 0.3166882407969638 |
| 0.4841415490117456 | 0.5250670693936570 | 0.6833117592161955 |
| 0.5230591398543680 | 0.5854751369229163 | 0.1691258762020311 |
| 0.4769408601558709 | 0.4145248630989613 | 0.8308741386780270 |
| 0.5110255844869798 | 0.8409111052481677 | 0.3050709825749962 |
| 0.4889744155905262 | 0.1590888947472351 | 0.6949290471719607 |
| 0.5055566693663920 | 0.7207806236337930 | 0.4457638143710270 |
| 0.4944433305765870 | 0.2792193764145594 | 0.5542361856421252 |
| 0.7853442619587199 | 0.0211355262796147 | 0.3554346469958958 |
| 0.2146557381094567 | 0.9788644439218785 | 0.6445653827510540 |
| 0.7970031328995049 | 0.0551116437822472 | 0.1913722658209736 |
| 0.2029968670854174 | 0.9448883785209219 | 0.8086277341921857 |
| 0.2055098434936227 | 0.0282670480330722 | 0.2104766580337056 |
| 0.7944901266498618 | 0.9717329370171512 | 0.7895233717790262 |
| 0.2186809203853670 | 0.9954091023807266 | 0.3733507095944972 |
| 0.7813190647205630 | 0.0045908796822260 | 0.6266492606190823 |
| 0.0264706653600442 | 0.7403689515357925 | 0.0826119342912008 |
| 0.9735293308160138 | 0.2596310484630706 | 0.9173880731554078 |
| 0.0571059274323389 | 0.5534248317833885 | 0.0968866257760439 |
| 0.9428940501453837 | 0.4465751681770200 | 0.9031133966032385 |
| 0.0636996951193467 | 0.4485192643029379 | 0.2459957895502853 |
| 0.9363002973697547 | 0.5514807655393241 | 0.7540042104628597 |
| 0.0342474288841217 | 0.5286458861907306 | 0.3798821102815069 |
| 0.9657525822423807 | 0.4713541137926924 | 0.6201179195312250 |
| 0.0057016037332858 | 0.7149066236962653 | 0.3649390665680627 |
| 0.9942984056197020 | 0.2850933762720231 | 0.6350609036455168 |

|                    |                    |                    |
|--------------------|--------------------|--------------------|
| 0.1791233064689735 | 0.2819700796221341 | 0.1566659773104320 |
| 0.8208767084213306 | 0.7180299502125607 | 0.8433339929031476 |
| 0.2317286532361038 | 0.2259048471623615 | 0.3165751422621099 |
| 0.7682713616216787 | 0.7740951528935511 | 0.6834248875506290 |
| 0.5349075342999114 | 0.2530849774179771 | 0.3719115807200026 |
| 0.4650924657699917 | 0.7469150225654388 | 0.6280884490927292 |
| 0.7852836332614075 | 0.3399526616769819 | 0.2711381700100404 |
| 0.2147163667010830 | 0.6600473383032934 | 0.7288618001377571 |
| 0.7318061240344065 | 0.3968958541973180 | 0.1110870844003671 |
| 0.2681938760230480 | 0.6031041457939850 | 0.8889128932466690 |
| 0.9904053213103694 | 0.8816081102549163 | 0.2851080157213275 |
| 0.0095947075295584 | 0.1183918897858618 | 0.7148919544922450 |
| 0.0045893573049298 | 0.8978226650355552 | 0.1404870347276130 |
| 0.9954106380178587 | 0.1021773349787622 | 0.8595129503528582 |
| 0.5585343762035748 | 0.3980494812792941 | 0.9817333314220207 |
| 0.4414656238252306 | 0.6019505484636056 | 0.0182666667492271 |
| 0.2604804760334574 | 0.3770085994256931 | 0.0112706681102352 |
| 0.7395195536695383 | 0.6229913707887391 | 0.9887293540059190 |

**2PdphNO2 LSLS b**

|                    |                     |                     |
|--------------------|---------------------|---------------------|
| 1.0000000000000000 |                     |                     |
| 7.3616027346835500 | -0.0075017723292287 | -0.1187458399682025 |
| 0.0194681186274285 | 13.3511436984845560 | -0.1041146247148527 |
| 0.6070393136745524 | 2.3176187072207175  | 15.1240892042566504 |

|    |    |    |    |    |   |  |
|----|----|----|----|----|---|--|
| Pd | Fe | N  | C  | H  | O |  |
| 2  | 2  | 16 | 60 | 36 | 8 |  |

Direct

|                    |                    |                    |
|--------------------|--------------------|--------------------|
| 0.0016898368766149 | 0.2596529850726483 | 0.4667599799973701 |
| 0.9983101852971643 | 0.7403469851168580 | 0.5332400498153618 |
| 0.4999999999714859 | 0.5000000000241727 | 0.5000000000065796 |
| 0.4999999999576374 | 0.0000000000314202 | 0.5000000000065796 |
| 0.5052513807863122 | 0.5884428945351345 | 0.3860909990915005 |
| 0.4947486193064705 | 0.4115571055056506 | 0.6139089711220720 |
| 0.3191067218693462 | 0.4163506997960269 | 0.4631685800168341 |
| 0.6808933079151558 | 0.5836493001873890 | 0.5368314497958977 |
| 0.3148308601775938 | 0.0985654649073169 | 0.4939457180828200 |
| 0.6851691099978581 | 0.9014345127488070 | 0.5060543117299119 |
| 0.6817871137699996 | 0.1010229689266779 | 0.4907531826752276 |
| 0.3182128861848952 | 0.8989770310416176 | 0.5092467875383591 |
| 0.5001720044480322 | 0.0111100393214940 | 0.3706241112536688 |
| 0.4998279955845533 | 0.9888899746376083 | 0.6293758589599108 |
| 0.3114975322163289 | 0.5812507326895471 | 0.5366177838984001 |
| 0.6885024380123639 | 0.4187492672863087 | 0.4633822161147592 |
| 0.0028968352336918 | 0.8505770559572525 | 0.2146087716136265 |
| 0.9971031880739432 | 0.1494229441030797 | 0.7853912283337436 |
| 0.2758350827366769 | 0.3698058823404793 | 0.0652029643980327 |
| 0.7241649171540558 | 0.6301940878524803 | 0.9347970431143651 |
| 0.5134145470829594 | 0.5486357735867813 | 0.3097220913283465 |
| 0.4865854528603322 | 0.4513642263890745 | 0.6902779086848199 |
| 0.5155254259764774 | 0.6080531435293963 | 0.2277043621785211 |
| 0.4844745740261658 | 0.3919468564804873 | 0.7722956527673119 |
| 0.5076757947961923 | 0.7142745587348571 | 0.2226930435238543 |
| 0.4923242053041861 | 0.2857254413179078 | 0.7773069266239290 |
| 0.5006057025148039 | 0.7550161722007047 | 0.3026687220071338 |
| 0.4993942975779788 | 0.2449838278400804 | 0.6973312482064529 |
| 0.5001568123123263 | 0.6904677330024924 | 0.3819889059992079 |
| 0.4998431876385609 | 0.3095322669853502 | 0.6180110939481835 |

|                    |                     |                    |
|--------------------|---------------------|--------------------|
| 0.5060651718580971 | 0.7764371392376219  | 0.1401719449707812 |
| 0.4939348280964850 | 0.2235628608031632  | 0.8598280252427983 |
| 0.5037566784862122 | 0.8262639362582647  | 0.0662597119889057 |
| 0.4962433214923792 | 0.1737360637670733  | 0.9337402805908042 |
| 0.1971865340409380 | 0.3614442428179458  | 0.4576014759064790 |
| 0.8028134510932361 | 0.6385557273715534  | 0.5423985539062528 |
| 0.8046290972330468 | 0.1577069290809519  | 0.4824389111948761 |
| 0.1953709026535577 | 0.8422930857676079  | 0.5175610887524940 |
| 0.1928646741429318 | 0.1553007222778646  | 0.4845370264567421 |
| 0.8071353555885779 | 0.8446992926311978  | 0.5154629735564171 |
| 0.1887348201912076 | 0.6358956744624678  | 0.5426904100920638 |
| 0.8112651946784837 | 0.3641043255133880  | 0.4573095899210955 |
| 0.6582215722568208 | 0.0194323230389557  | 0.3230396254813641 |
| 0.3417784276771485 | 0.9805676471429834  | 0.6769603745318022 |
| 0.6638440774214089 | 0.0391279062348886  | 0.2316848609345712 |
| 0.3361559225812343 | 0.9608720937749951  | 0.7683151540112618 |
| 0.4997534663670535 | 0.0518288646185070  | 0.1858483822344539 |
| 0.5002465335895607 | 0.94817111167535707 | 0.8141516029118065 |
| 0.3360411565909089 | 0.0362797971789135  | 0.2356000146398358 |
| 0.6639588433067658 | 0.9637202288673308  | 0.7644000002402151 |
| 0.3420007738184978 | 0.0163723435440133  | 0.3267865813385313 |
| 0.6579992261657850 | 0.9836276815787457  | 0.6732133888750482 |
| 0.4990180085293758 | 0.0853683455188730  | 0.0944729684041263 |
| 0.5009819914666025 | 0.9146316396038330  | 0.9055270614085913 |
| 0.4979145697104670 | 0.1245148823371665  | 0.0168711413042999 |
| 0.5020854301724071 | 0.8754850952734756  | 0.9831288493677093 |
| 0.0094785614407016 | 0.7399354274827630  | 0.2217815433249797 |
| 0.9905214366462261 | 0.2600645725315545  | 0.7782184417554916 |
| 0.0062851915912319 | 0.6944898142598603  | 0.1451580723873533 |
| 0.9937148269504021 | 0.3055101857544500  | 0.8548419126931108 |
| 0.0125284068918816 | 0.5890782722303882  | 0.1537200841057498 |
| 0.9874716005742741 | 0.4109217277070059  | 0.8462799308400974 |
| 0.0223247685276604 | 0.5317227326997767  | 0.2374974289198732 |
| 0.9776752184837960 | 0.4682772672376174  | 0.7625025860259598 |
| 0.0251365324603867 | 0.5788139542974520  | 0.3134371474112001 |
| 0.9748634656746162 | 0.4211860456859640  | 0.6865628824015317 |
| 0.0185309287598088 | 0.6838117967936626  | 0.3059030687242270 |
| 0.9814690758938340 | 0.3161882032471226  | 0.6940969014893383 |
| 0.3988291111429731 | 0.3391241890948606  | 0.1382712208988366 |
| 0.6011708889385261 | 0.6608758108809951  | 0.8617287791143227 |
| 0.3254940470857122 | 0.2990571332608951  | 0.2208644969839995 |
| 0.6745059528575794 | 0.7009428667149535  | 0.7791355030291527 |
| 0.5864212094727748 | 0.3500456033443413  | 0.1222898981490772 |
| 0.4135787905134265 | 0.6499543966929764  | 0.8777100943648435 |
| 0.4435107033116807 | 0.2699161665306633  | 0.2895996569403039 |
| 0.5564892966316108 | 0.7300838334451925  | 0.7104003430728554 |
| 0.6312049713421786 | 0.2795674678473290  | 0.2748347744329465 |
| 0.3687950286514479 | 0.7204325022961626  | 0.7251652405128937 |
| 0.7025385334939571 | 0.3191875502621215  | 0.1915388818131518 |
| 0.2974614665162818 | 0.6808124497597561  | 0.8084611330668992 |
| 0.5182451958472640 | 0.4667145902808869  | 0.3162540872465840 |
| 0.4817548040957078 | 0.5332854097674513  | 0.6837459127665824 |
| 0.5236881099748132 | 0.5731285385577962  | 0.1679074564920597 |
| 0.4763118900354257 | 0.4268714614640885  | 0.8320925583879983 |
| 0.4950809615702880 | 0.8362064175418382  | 0.3025896065264675 |
| 0.5049190385072109 | 0.1637935824535575  | 0.6974104232204823 |
| 0.4949346116346476 | 0.7196936953100845  | 0.4444018072983056 |
| 0.5050653883083314 | 0.2803063047382679  | 0.5555981927148466 |

|                    |                    |                    |
|--------------------|--------------------|--------------------|
| 0.7814384845797022 | 0.0108294229990378 | 0.3605294922065454 |
| 0.2185615154884744 | 0.9891705472024626 | 0.6394705375404115 |
| 0.7934186991534133 | 0.0456912379032985 | 0.1961051764190103 |
| 0.2065813008315089 | 0.9543087843998634 | 0.8038948235941490 |
| 0.2063358538626048 | 0.0406275512171419 | 0.2031674620129635 |
| 0.7936641162808797 | 0.9593724338330745 | 0.7968325677997612 |
| 0.2190100224666054 | 0.0052470380566874 | 0.3671504020888534 |
| 0.7809899626393246 | 0.9947529440062581 | 0.6328495681247261 |
| 0.9976351055145400 | 0.7409021001694995 | 0.0810490306705489 |
| 0.0023648906615179 | 0.2590978998293636 | 0.9189509767760597 |
| 0.0067596294579673 | 0.5522208754296685 | 0.0949862691467516 |
| 0.9932403481197554 | 0.4477791245307401 | 0.9050137532325451 |
| 0.0271391397123466 | 0.4495529083810865 | 0.2439515010367685 |
| 0.9728608527767477 | 0.5504471214611755 | 0.7560484989763836 |
| 0.0326292809722659 | 0.5340003486107037 | 0.3783234409316023 |
| 0.9673707301542365 | 0.4659996513727123 | 0.6216765888811295 |
| 0.0204019946715022 | 0.7223119493280308 | 0.3638382592181344 |
| 0.9795980146814856 | 0.2776880506402577 | 0.6361617109954452 |
| 0.1792974292571330 | 0.2907587161443956 | 0.2300615673150972 |
| 0.8207025409675524 | 0.7092412838510000 | 0.7699384624318526 |
| 0.6371509801672488 | 0.3815720471791195 | 0.0570439078233278 |
| 0.3628490198455765 | 0.6184279229687846 | 0.9429560772571506 |
| 0.3898590395640156 | 0.2390944961022186 | 0.3544894316136862 |
| 0.6101409605380965 | 0.7609055337324691 | 0.6455105385999005 |
| 0.7216258048060595 | 0.2560952432355279 | 0.3289996243786177 |
| 0.2783741952661174 | 0.7439047269464112 | 0.6710003756345415 |
| 0.8487579300257551 | 0.3254377182305745 | 0.1801296308370439 |
| 0.1512420700655994 | 0.6745622519557912 | 0.8198703393107607 |
| 0.0004832798622516 | 0.8886703647214205 | 0.2846796266577343 |
| 0.9995167489776691 | 0.1113296353193647 | 0.7153203435558453 |
| 0.0003347613034776 | 0.9018231300041180 | 0.1396596260603147 |
| 0.9996652340193037 | 0.0981768700101924 | 0.8603403590201637 |
| 0.1095000675056355 | 0.3526424060649873 | 0.0779216390812891 |
| 0.8904999474327369 | 0.6473576237388201 | 0.9220783758645439 |
| 0.3428556773779547 | 0.4117969700333006 | 0.9937559585149742 |
| 0.6571443077672754 | 0.5882030299042498 | 0.0062440154482246 |
